# Supplementary material for: A straightforward sequence to alkyl 1H-pyrrole-2,5-dicarboxylates starting from acylhydrazono esters and alkyl 2-aroyl-1-chlorocyclopropanecarboxylates
Source: Royal Society of Chemistry journal article supplement (doi:10.1039/c6ra01829g), 2016-01-01
Supplement: c6ra01829g1.pdf [file c6ra01829g1.pdf]

## *Supporting Information*

A Straightforward Sequence to Alkyl 1*H*-Pyrrole-2,5-dicarboxylates

Starting from Acylhydrazono esters and Alkyl 2-Aroyl-1-

chlorocyclopropanecarboxylates

Zhimei Huang, yuefa Gong\*

School of Chemistry and Chemical Engineering, Huazhong University of Science and  
Technology, 1037 Luoyu Road, Wuhan 430074, People's Republic of China

[gongyf@mail.hust.edu.cn](mailto:gongyf@mail.hust.edu.cn)

### **Table of Contents**

|                                                            |     |
|------------------------------------------------------------|-----|
| I. <sup>1</sup> H NMR spectra of the reaction product..... | S2  |
| II. NMR spectra for all new compounds.....                 | S4  |
| III Crystallographic information for <b>3ba</b> .....      | S26 |

## I, <sup>1</sup>H NMR spectra of the reaction product

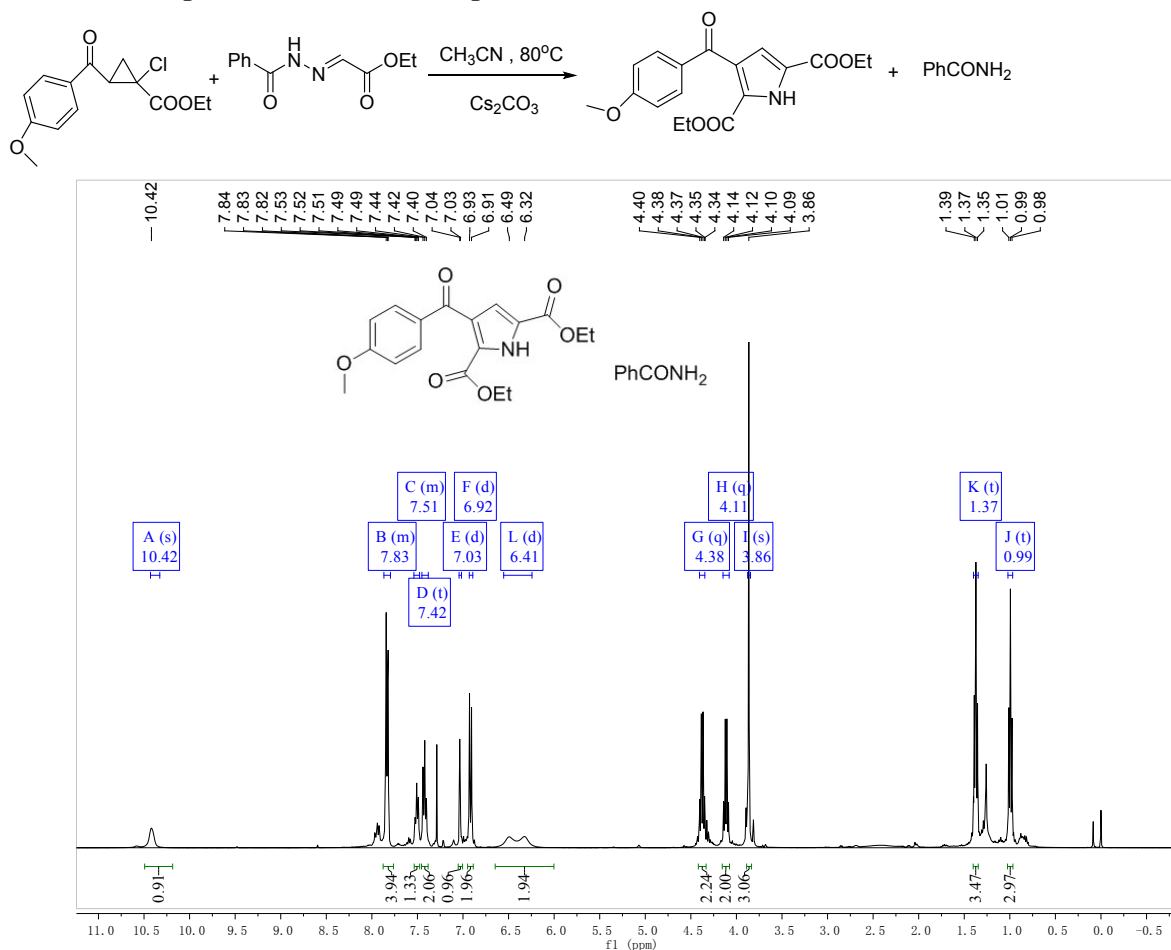

<sup>1</sup>H NMR (400 MHz, CDCl<sub>3</sub>) δ 10.42 (s, 1H), 7.87 – 7.80 (m, 4H), 7.54 – 7.48 (m, 1H), 7.42 (t, *J* = 7.5 Hz, 2H), 7.03 (d, *J* = 2.7 Hz, 1H), 6.92 (d, *J* = 8.8 Hz, 2H), 6.41 (2H), 4.38 (q, *J* = 7.1 Hz, 2H), 4.11 (q, *J* = 7.1 Hz, 2H), 3.86 (s, 3H), 1.37 (t, *J* = 7.1 Hz, 3H), 0.99 (t, *J* = 7.1 Hz, 3H).

General Procedure: A mixture of 0.2 mmol of **1c**, 0.2 mmol of **2a** and 0.4 mmol of Cs<sub>2</sub>CO<sub>3</sub> in 2mL CH<sub>3</sub>CN was stirred at 80°C until the starting materials disappeared by TLC analysis. Then the solvent CH<sub>3</sub>CN was removed under reduced pressure. The mixture was then washed with water and extracted with CH<sub>2</sub>Cl<sub>2</sub> for three times. Combined extracts were dried over anhydrous Na<sub>2</sub>SO<sub>4</sub> and concentrated under reduced pressure. The residue was dissolved in CDCl<sub>3</sub> and measured by <sup>1</sup>H NMR spectroscopy. The chemical shift at 6.41 was assigned to be the CONH<sub>2</sub> of benzamide. The residue was eluted using petroleum ether and ethyl acetate (8:1 to 2:1) on silica gel column chromatography, the product **3** and benzamide are collected.

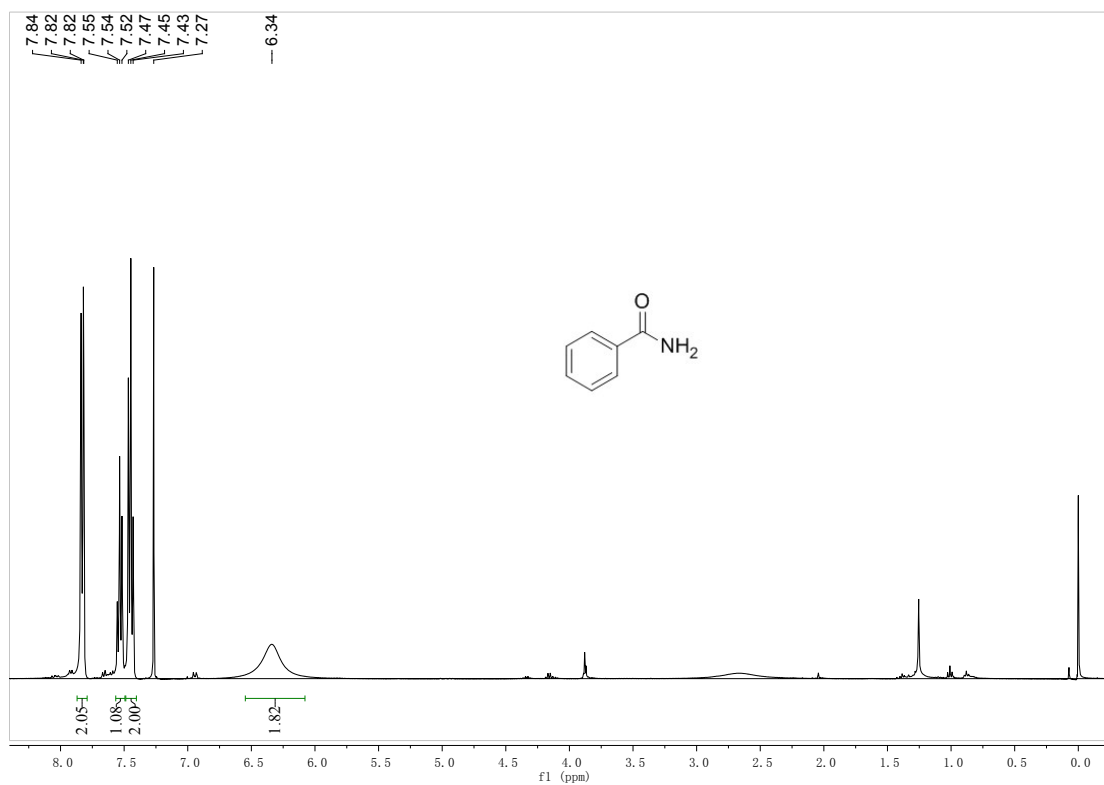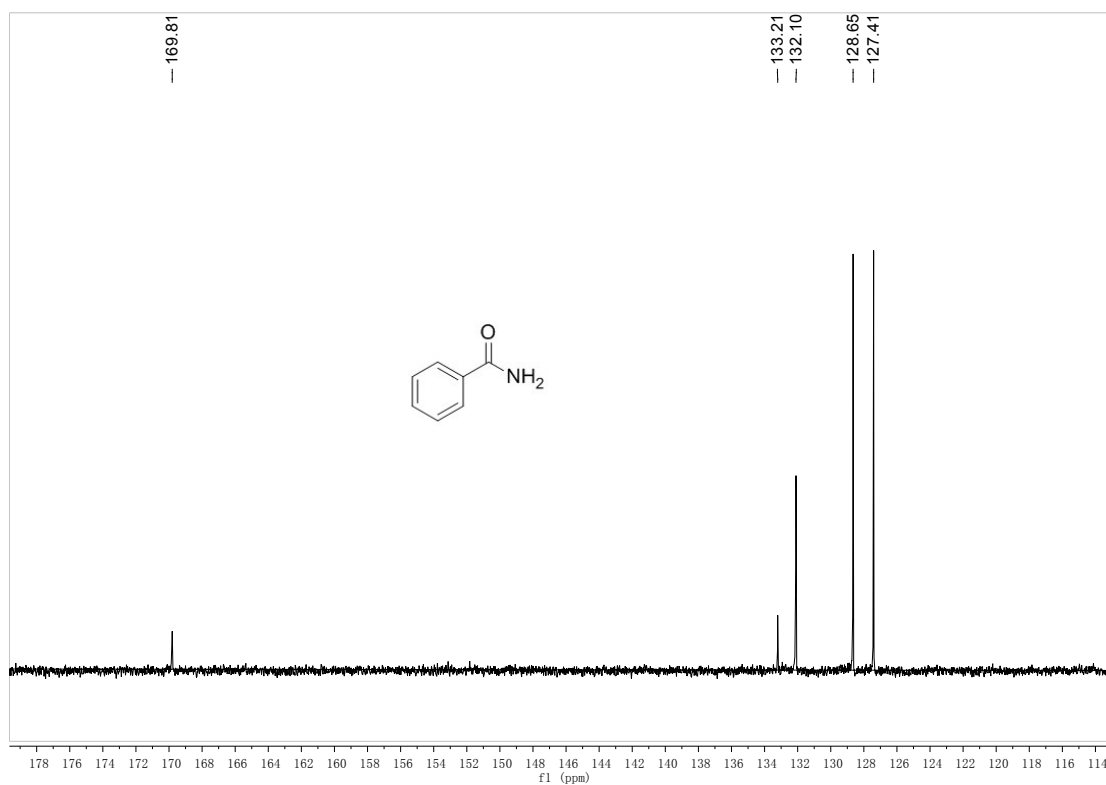

Spectroscopic data for benzamide:

<sup>1</sup>H NMR (400 MHz, CDCl<sub>3</sub>) δ 7.86 – 7.78 (m, 2H), 7.54 (t, *J* = 7.4 Hz, 1H), 7.45 (t, *J* = 7.5 Hz, 2H), 6.34 (s, 2H).

<sup>13</sup>C NMR (101 MHz, CDCl<sub>3</sub>) δ 169.81, 133.21, 132.10, 128.65, 127.41.

## II、NMR spectra for all new compounds

### 1、3aa

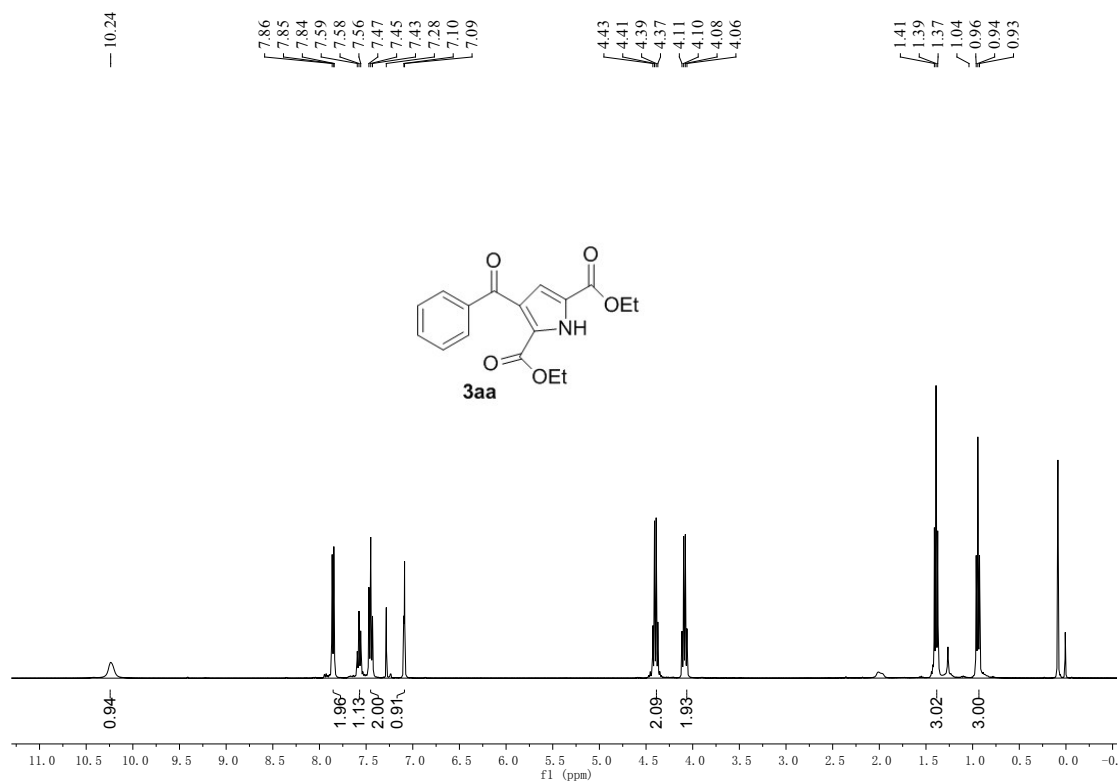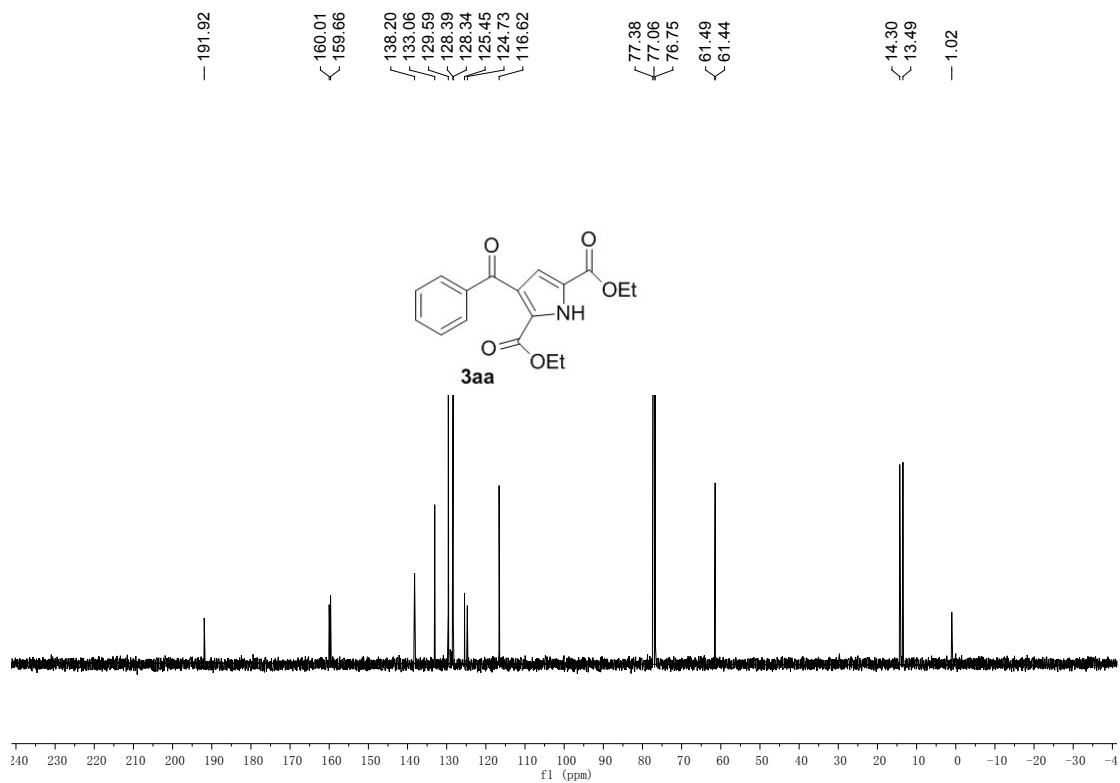

### 2. 3ba

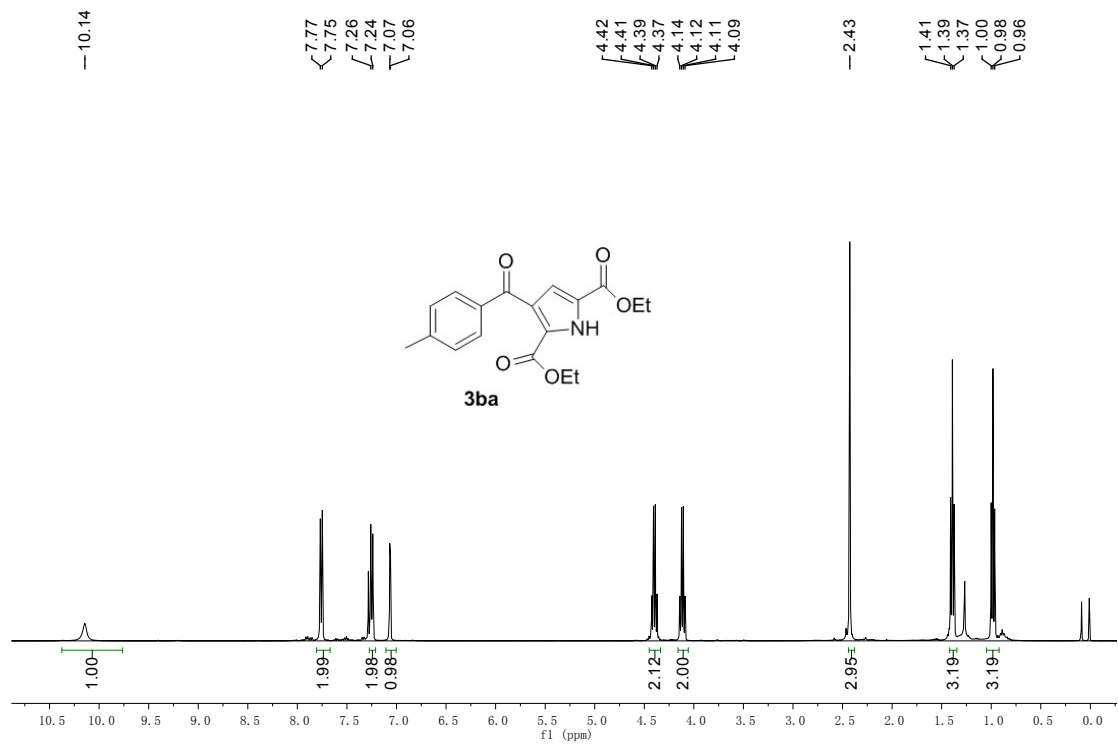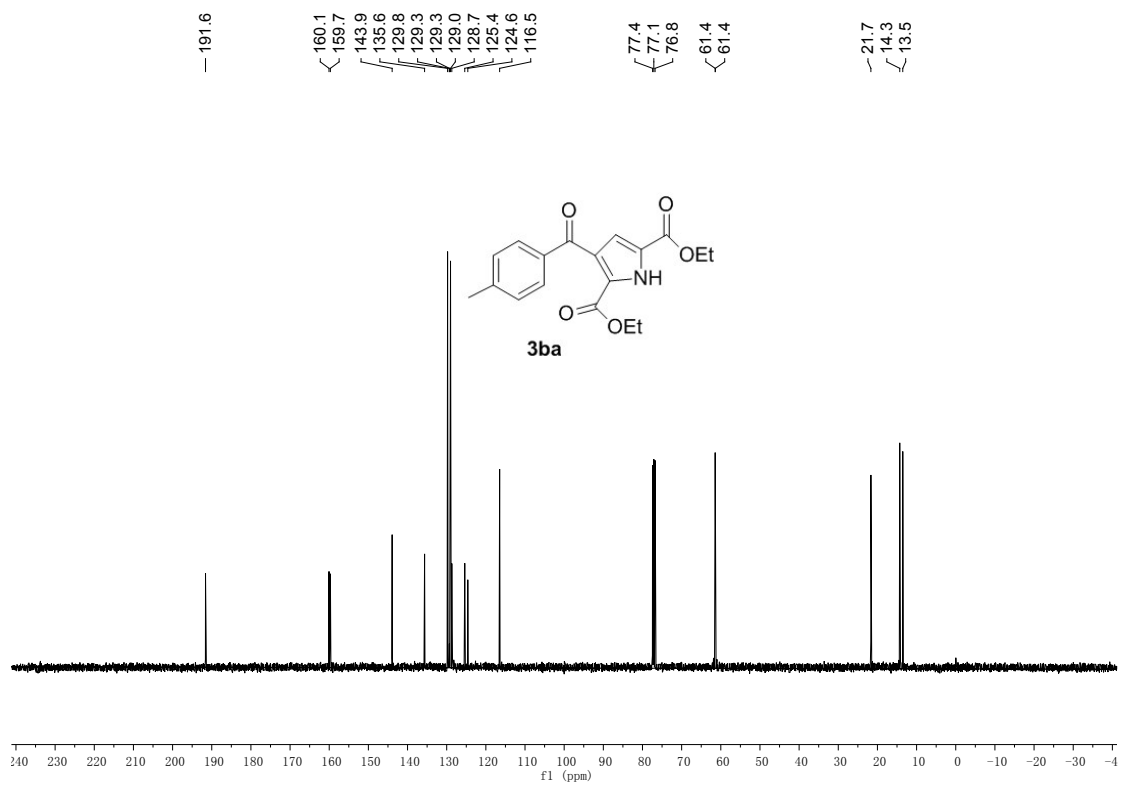

3. 3ca

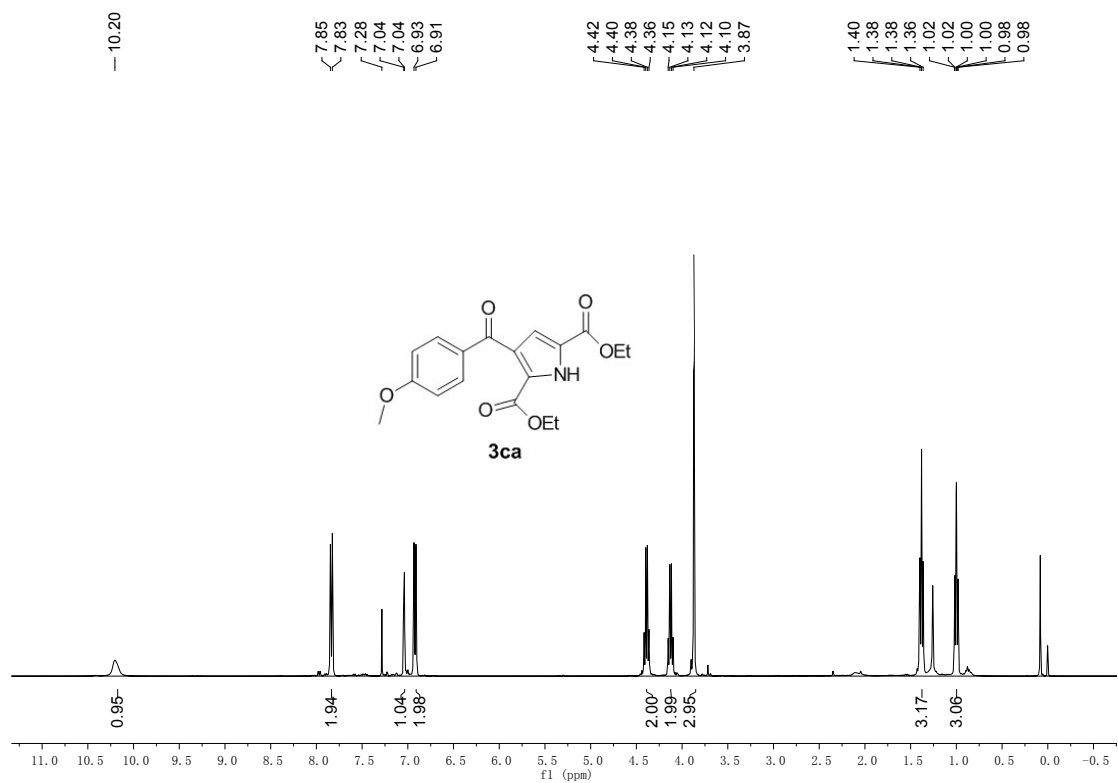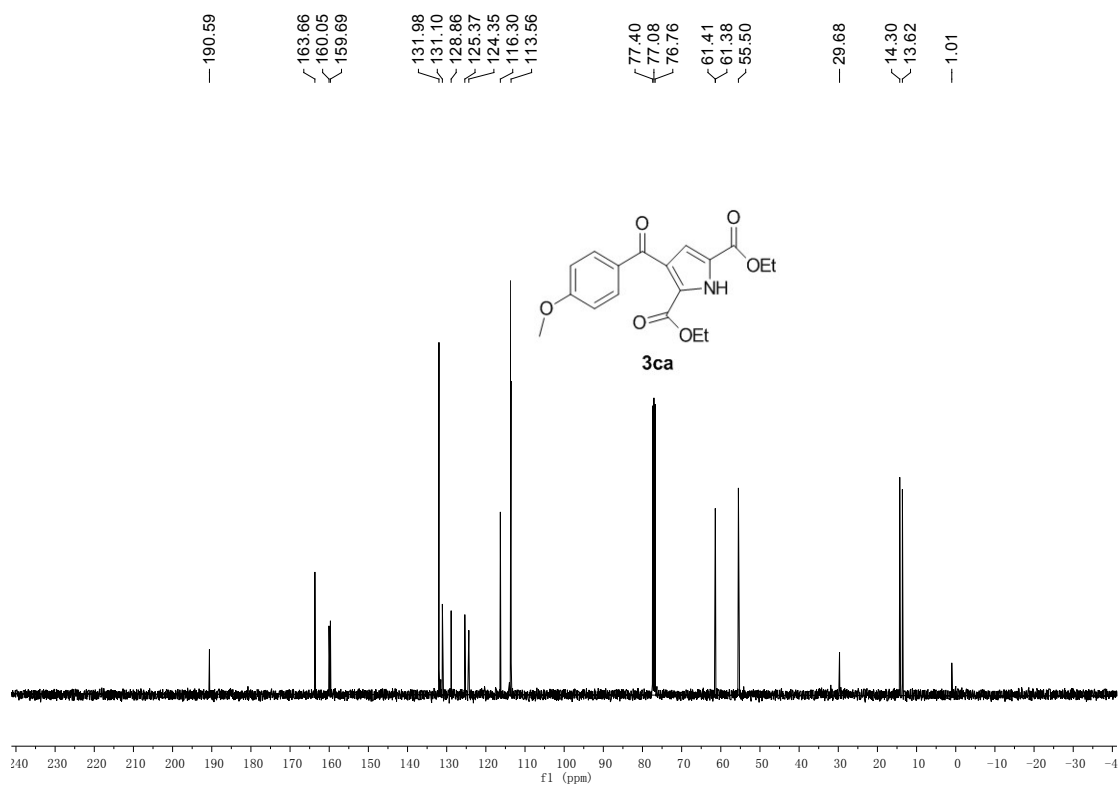

4. 3da

— 10.19

7.81  
7.79  
7.45  
7.43  
7.08  
7.07

4.43  
4.41  
4.40  
4.38  
4.16  
4.14  
4.13  
4.11

1.42  
1.40  
1.38  
1.03  
1.02  
1.01  
1.00  
0.09  
0.01

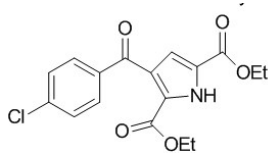

3da

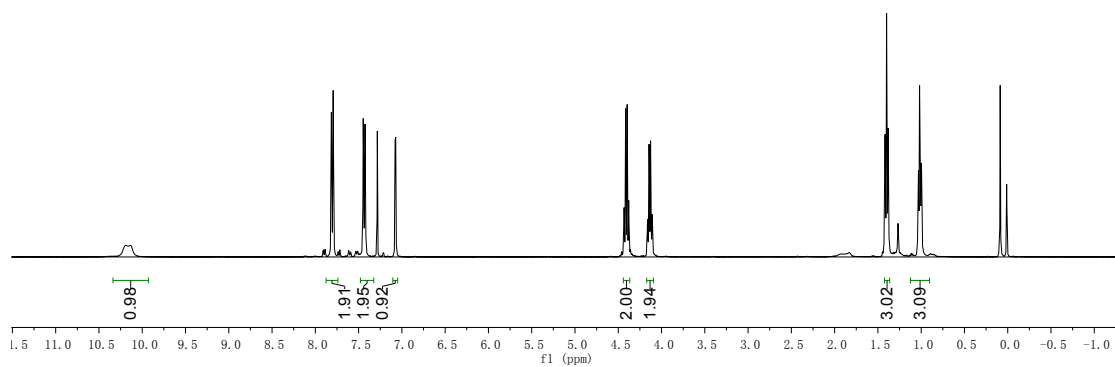

— 190.78

159.89  
159.40  
136.96  
131.68  
127.90  
125.65  
124.63  
116.52

77.36  
77.04  
76.73  
61.63  
61.53

14.31  
13.62  
— 1.02

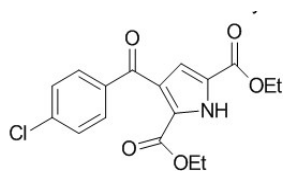

3da

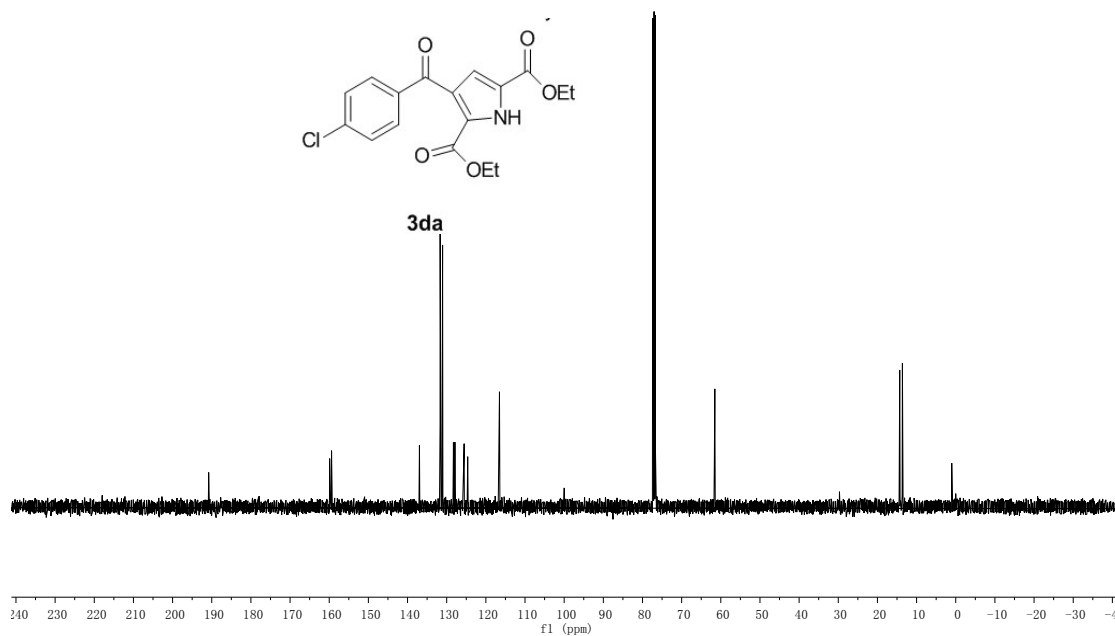

5. 3ea

— 10.13

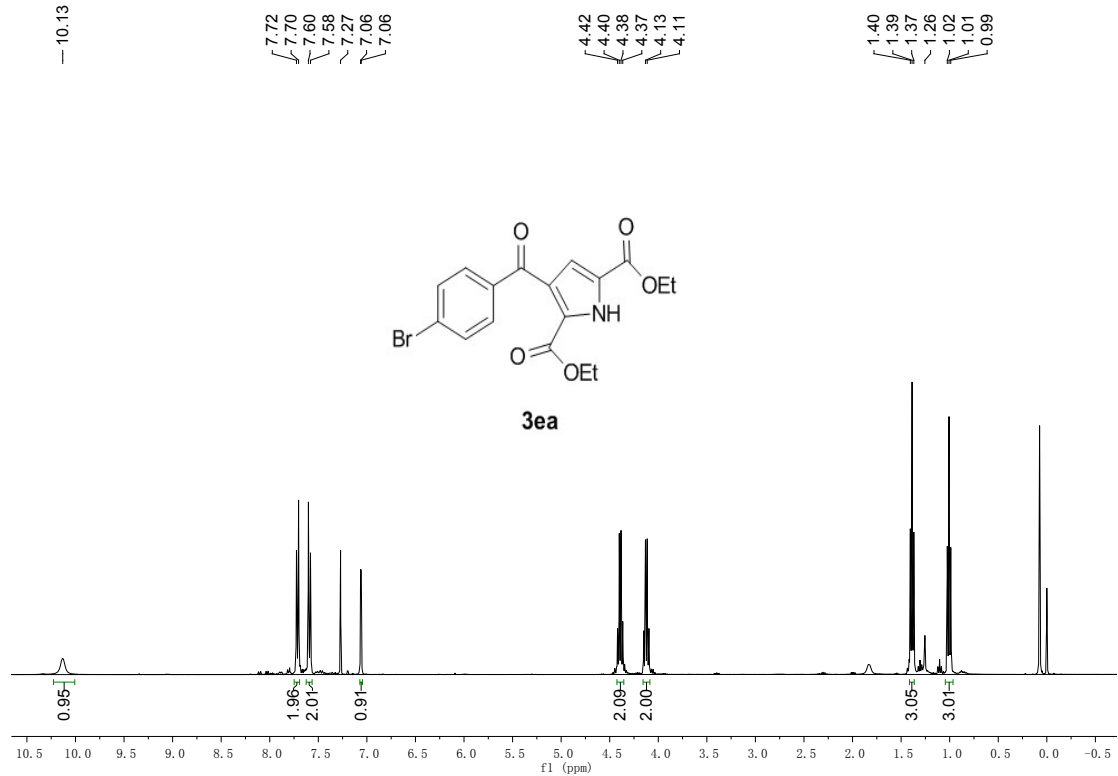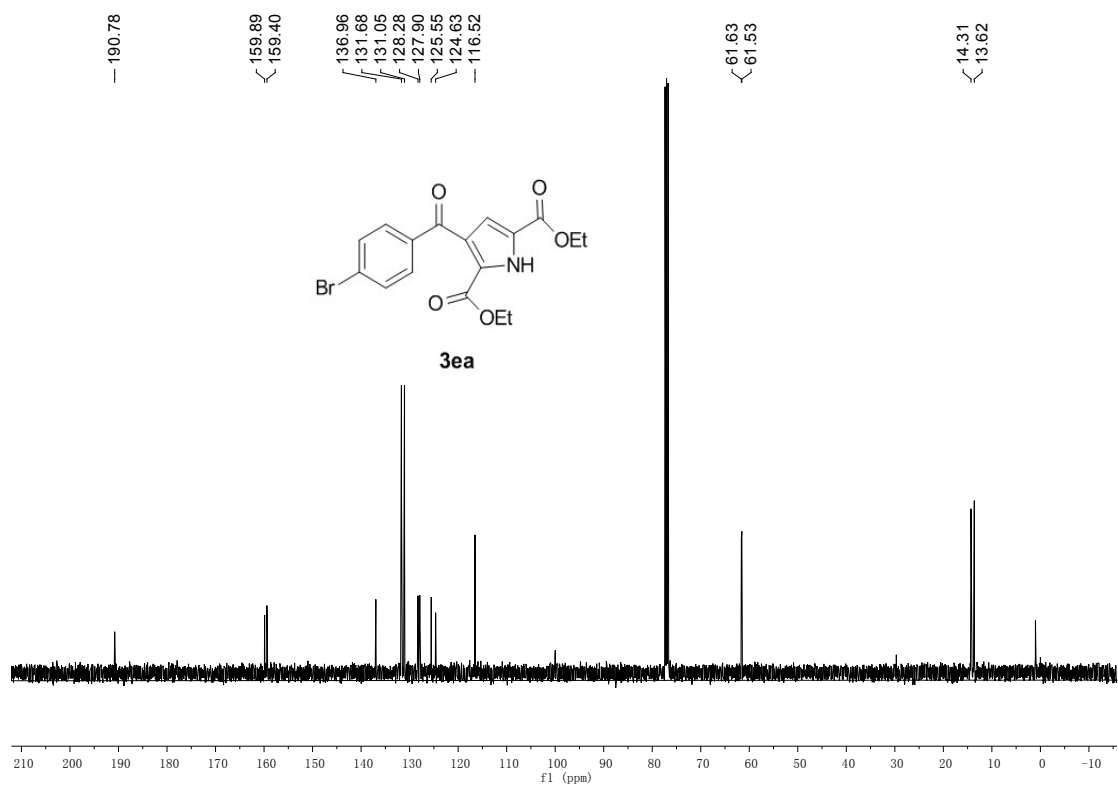

6. 3fa



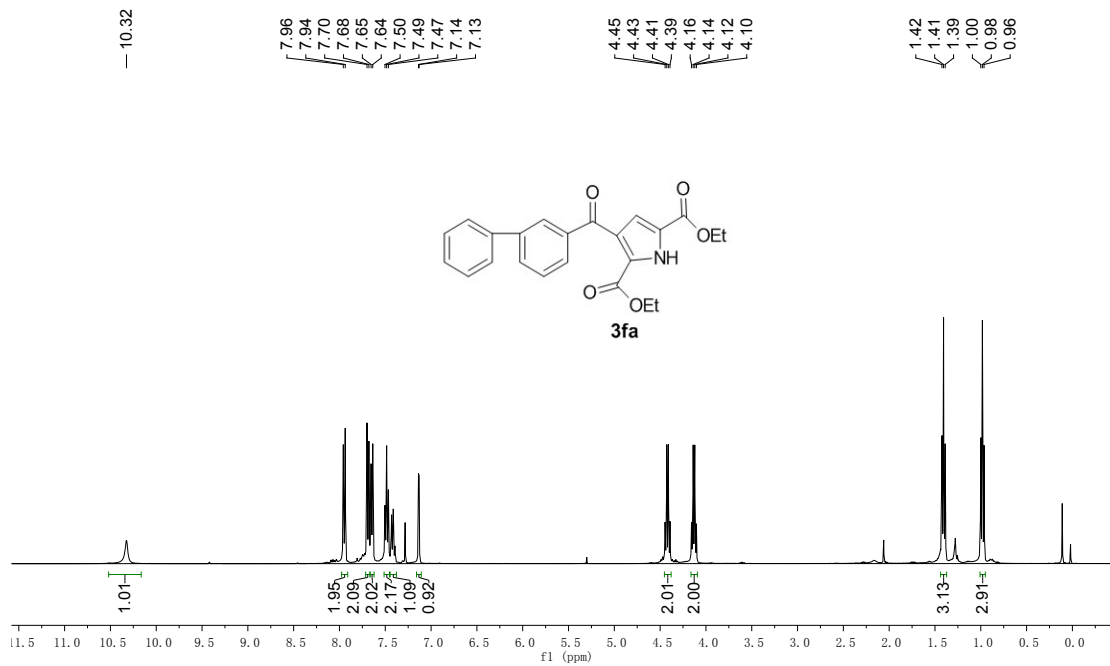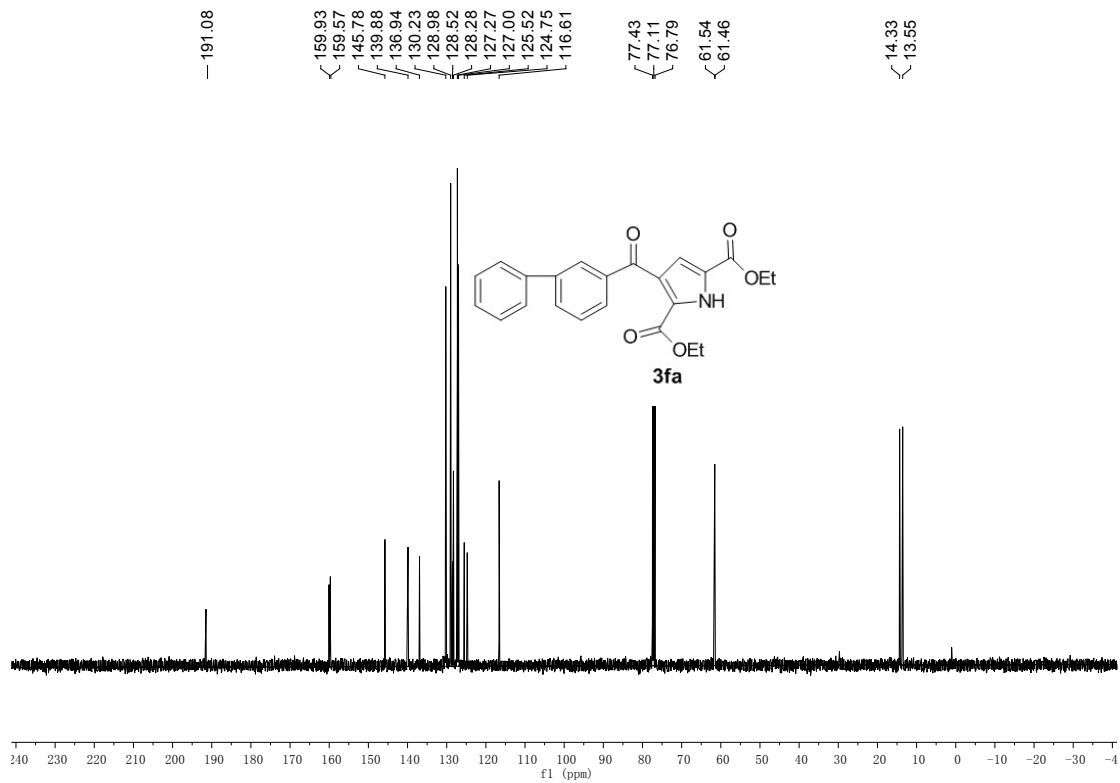

7. 3ga

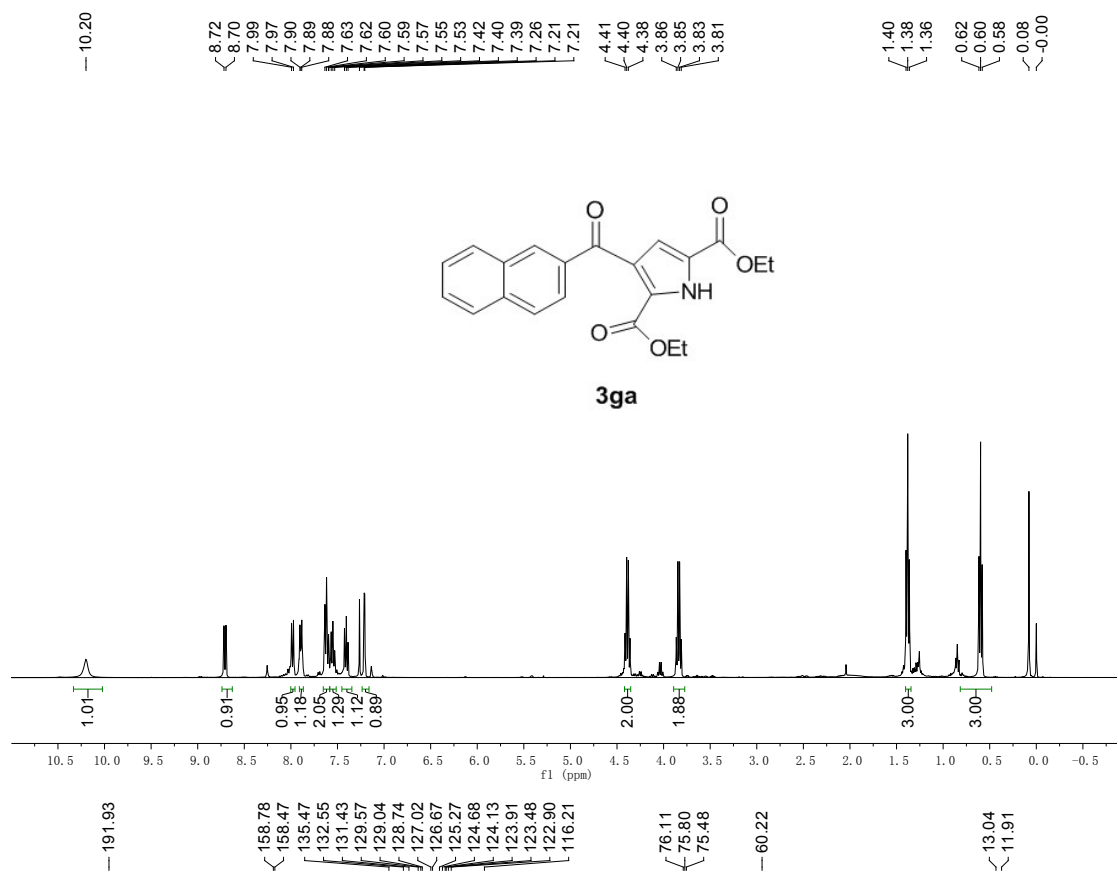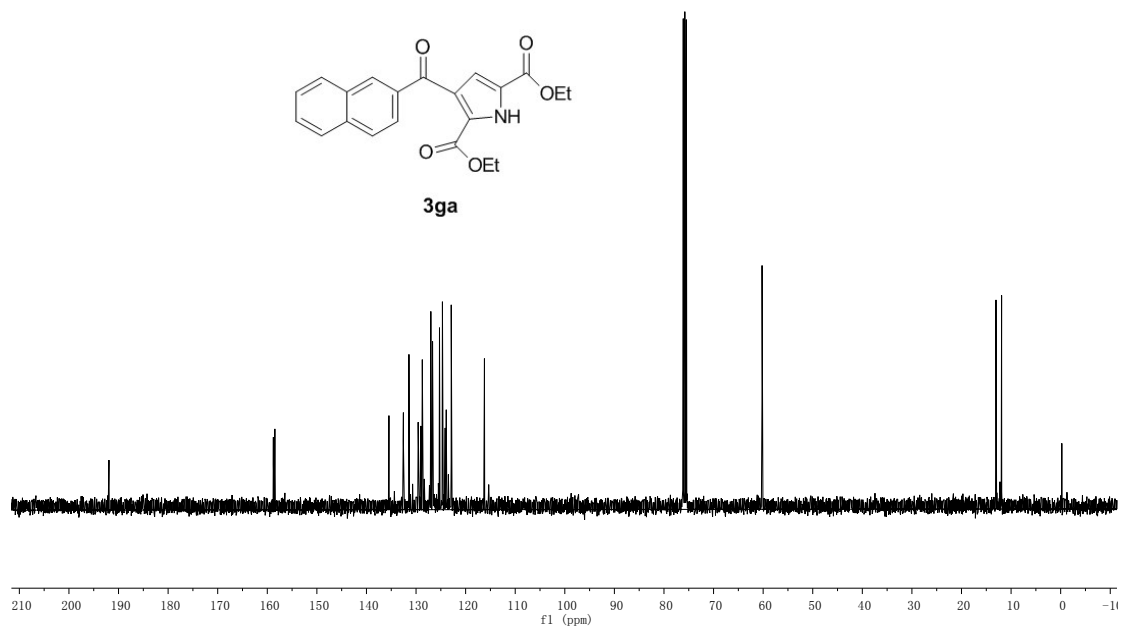

8. 3ha

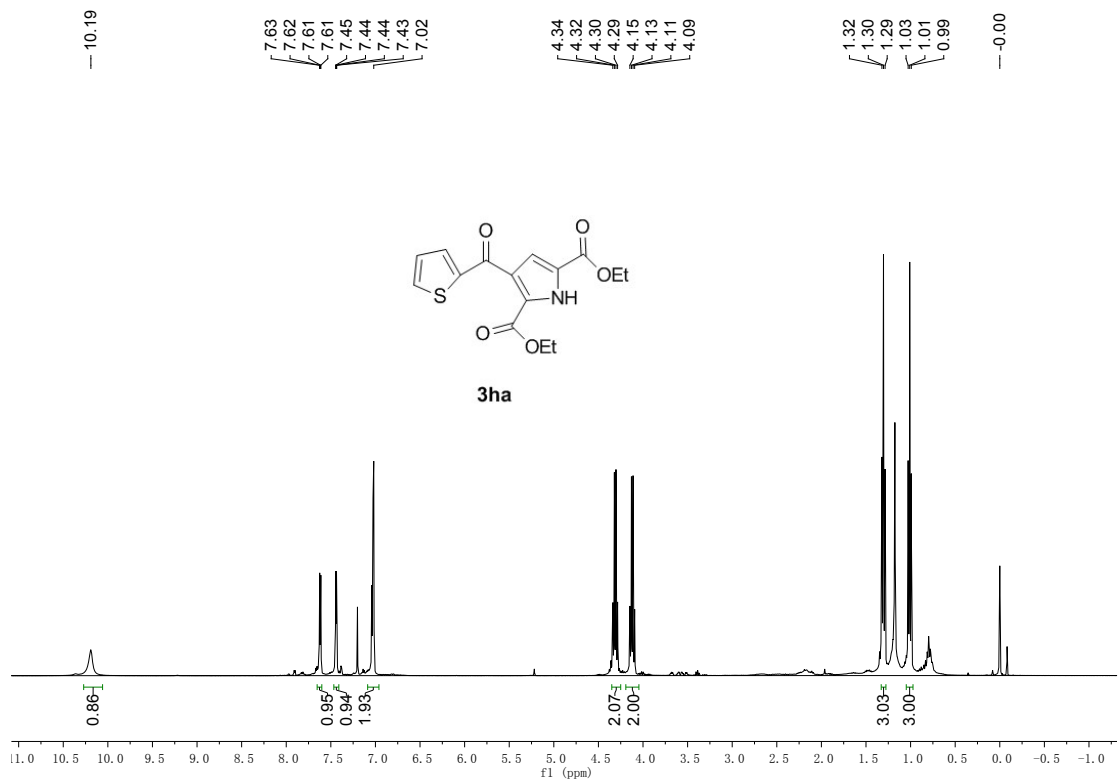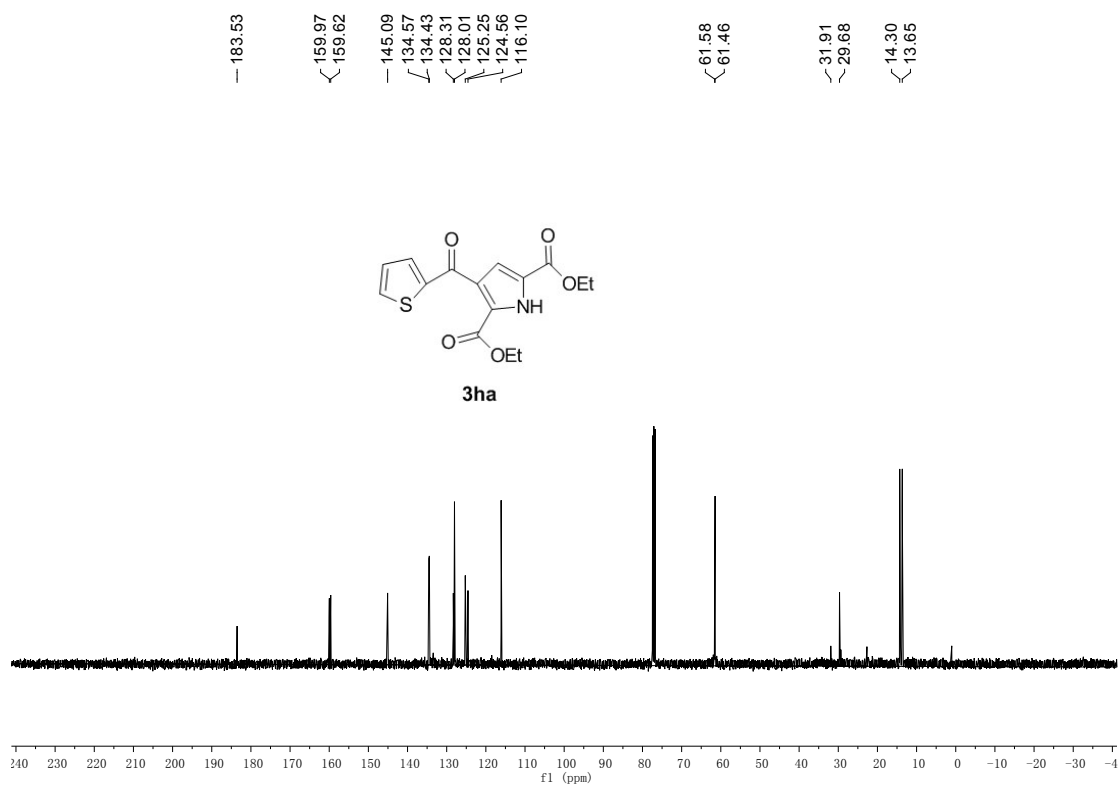

9. 3ia

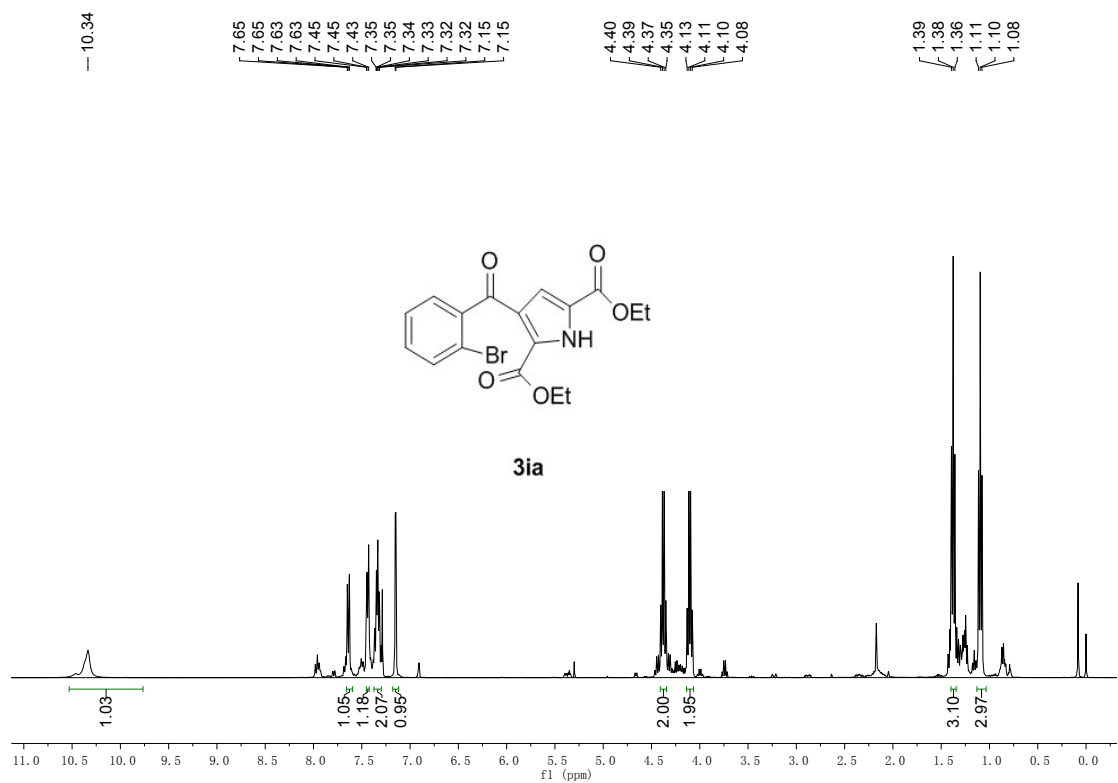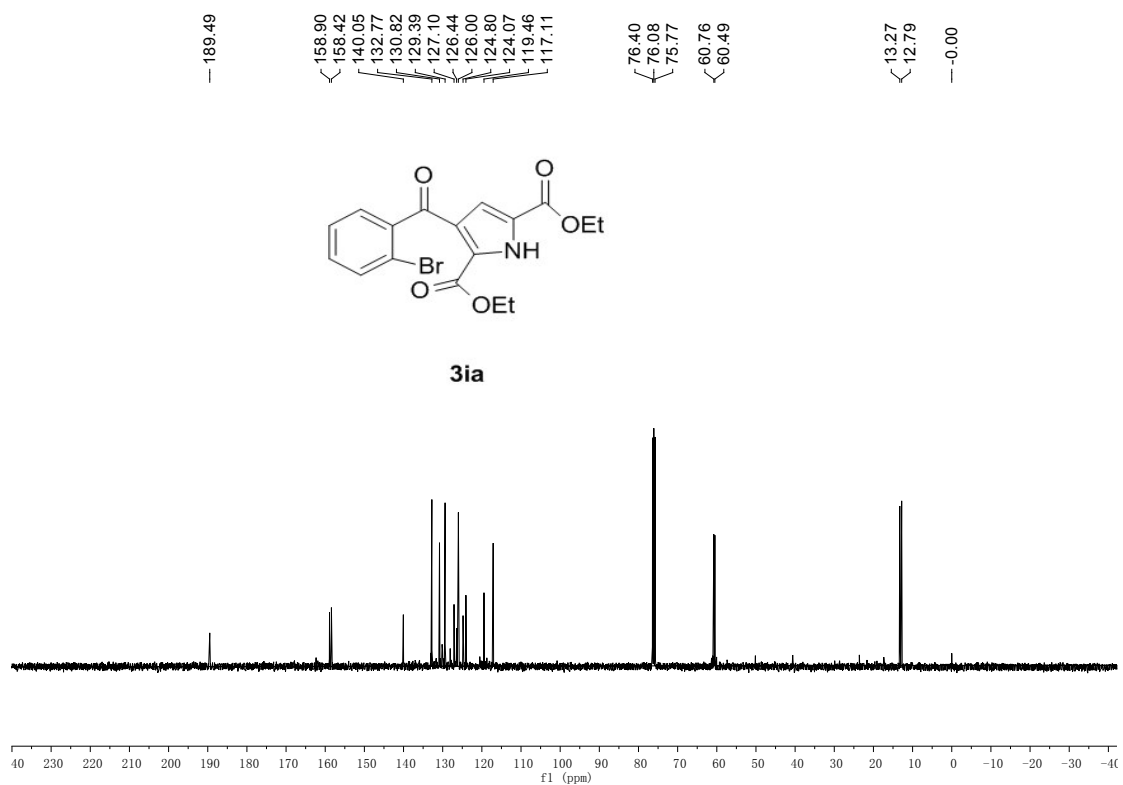

10. 3ja

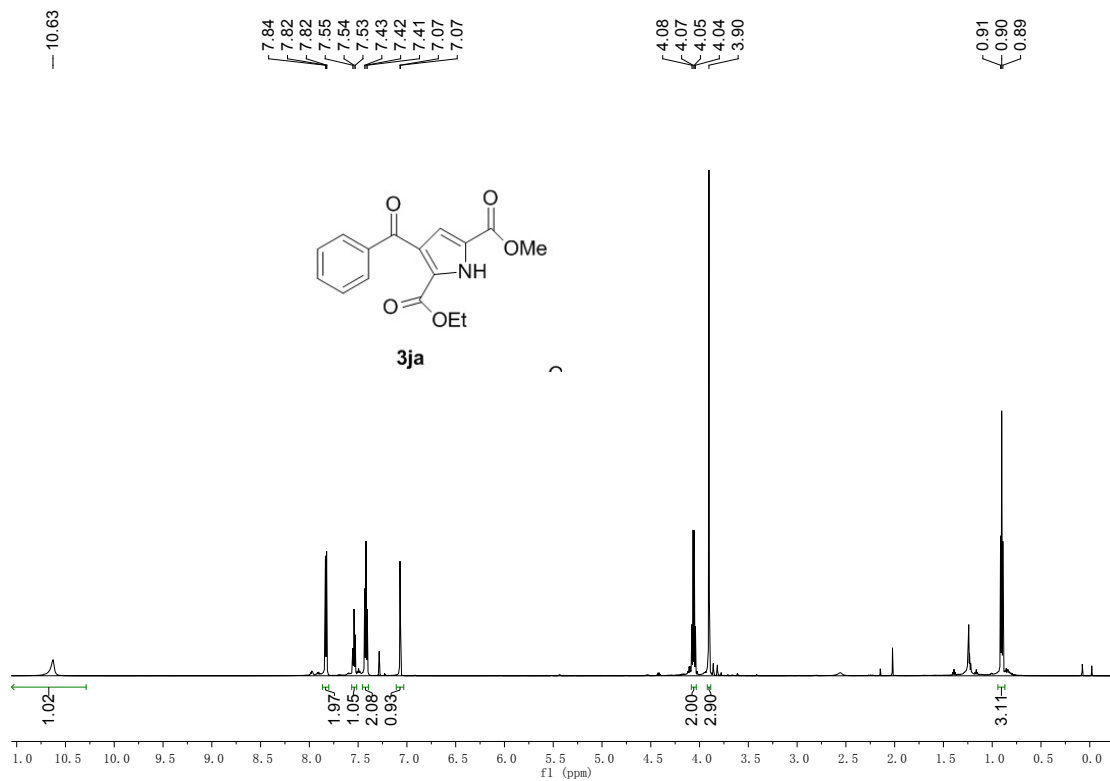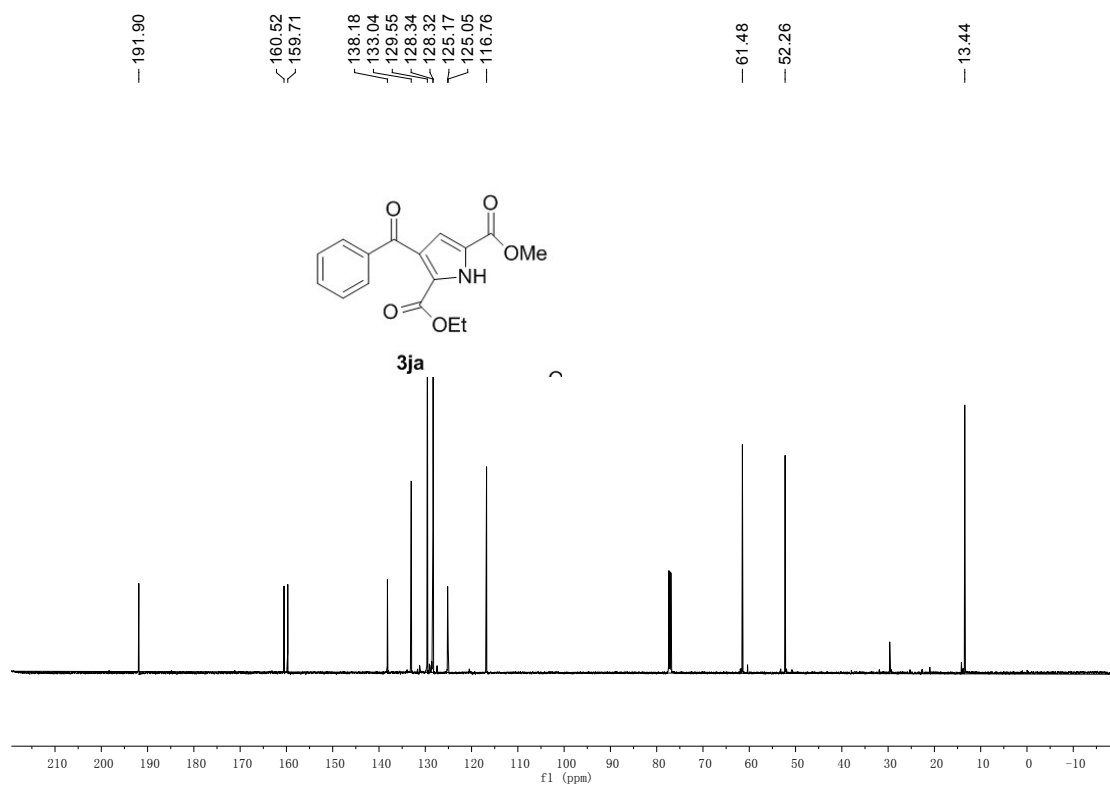

11. 3ka

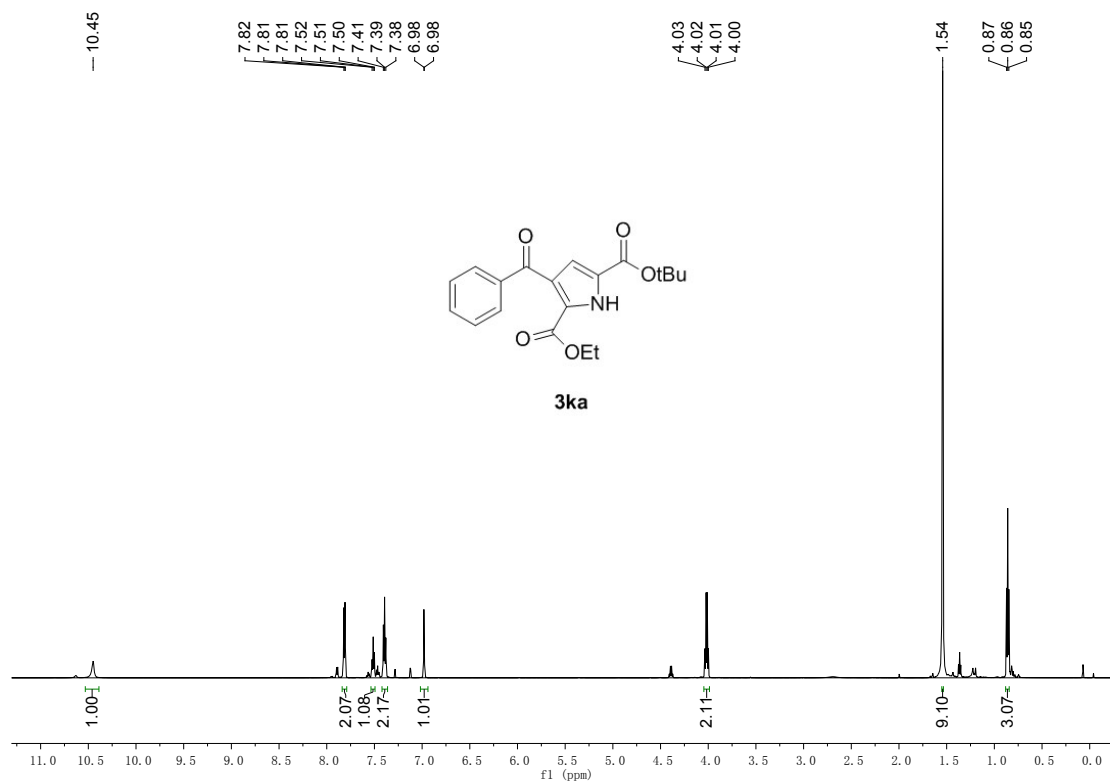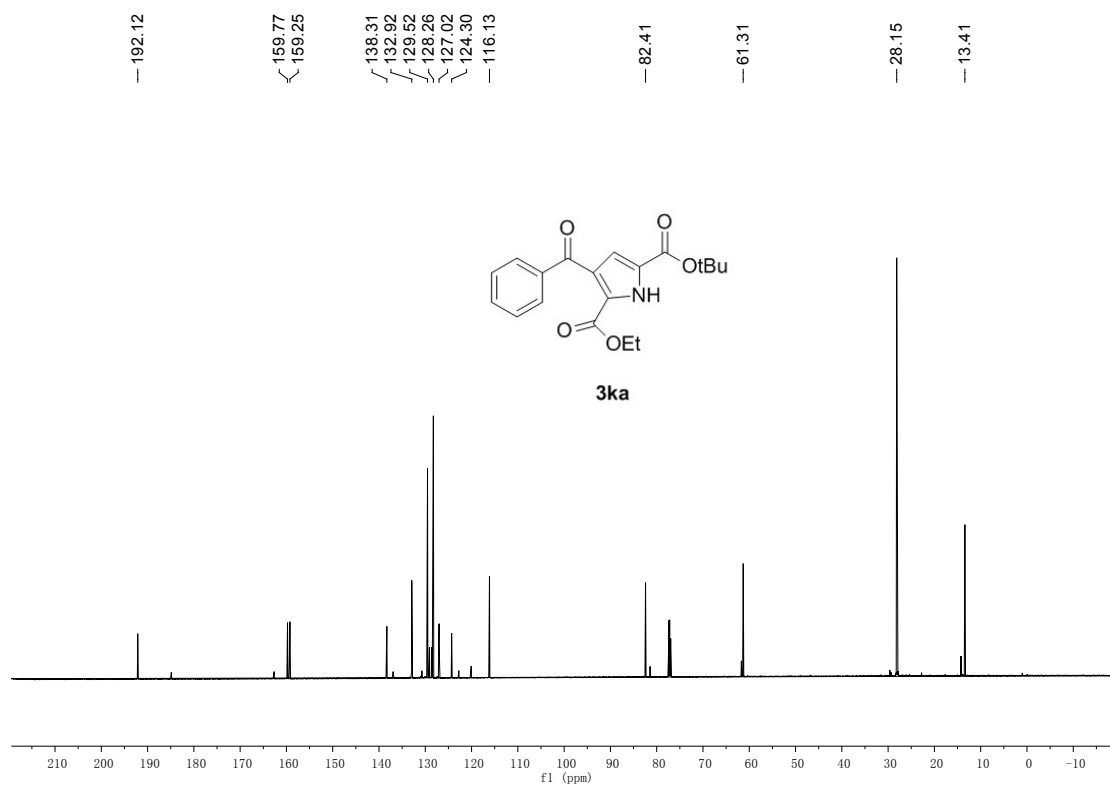

12. 3ab

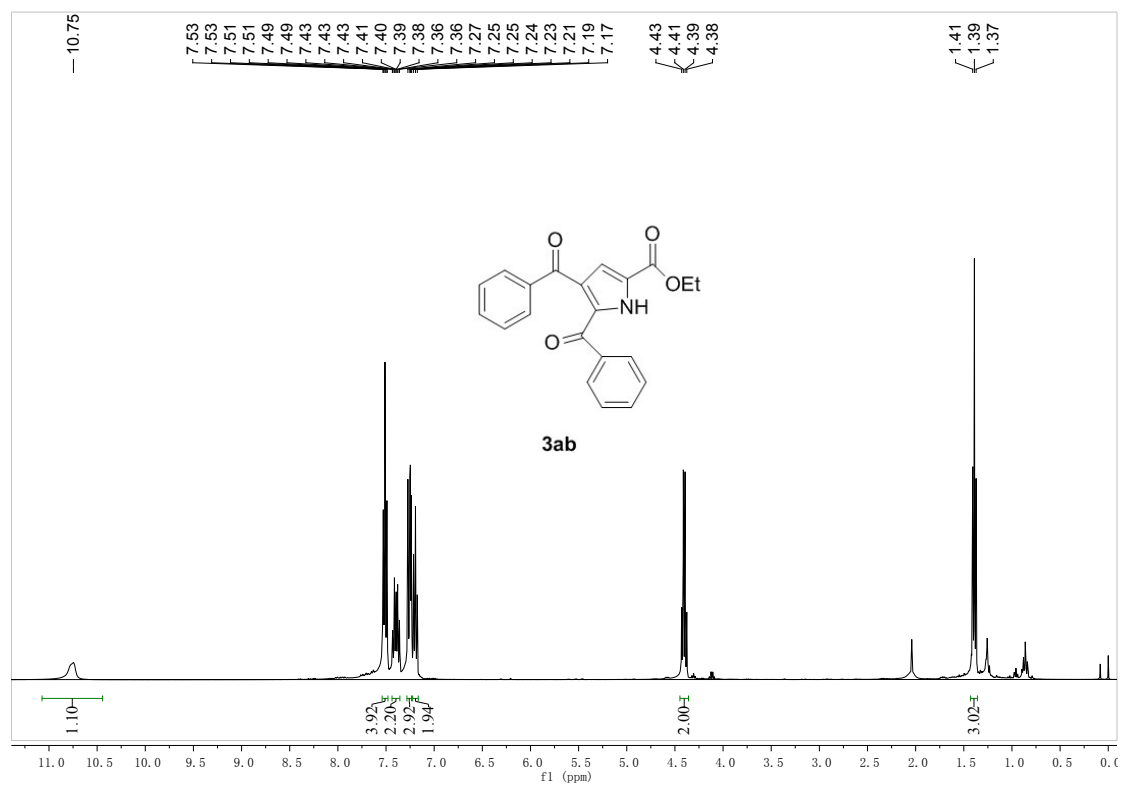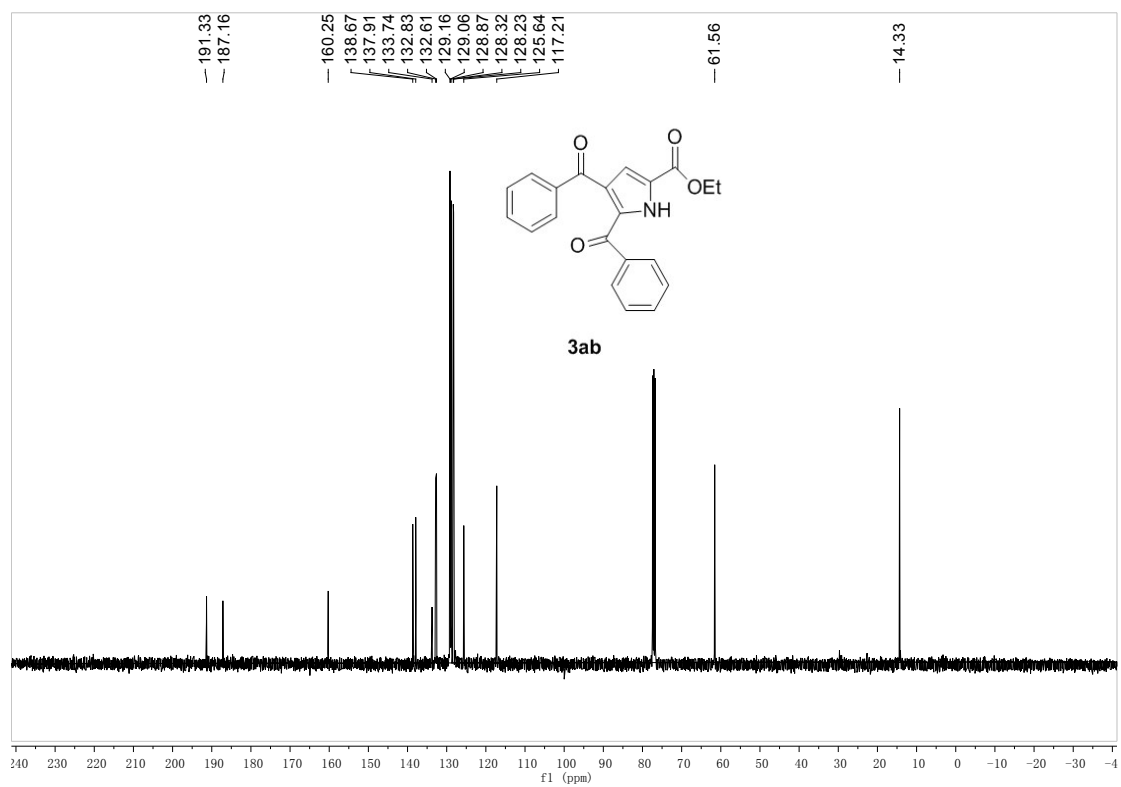

13. 3ac

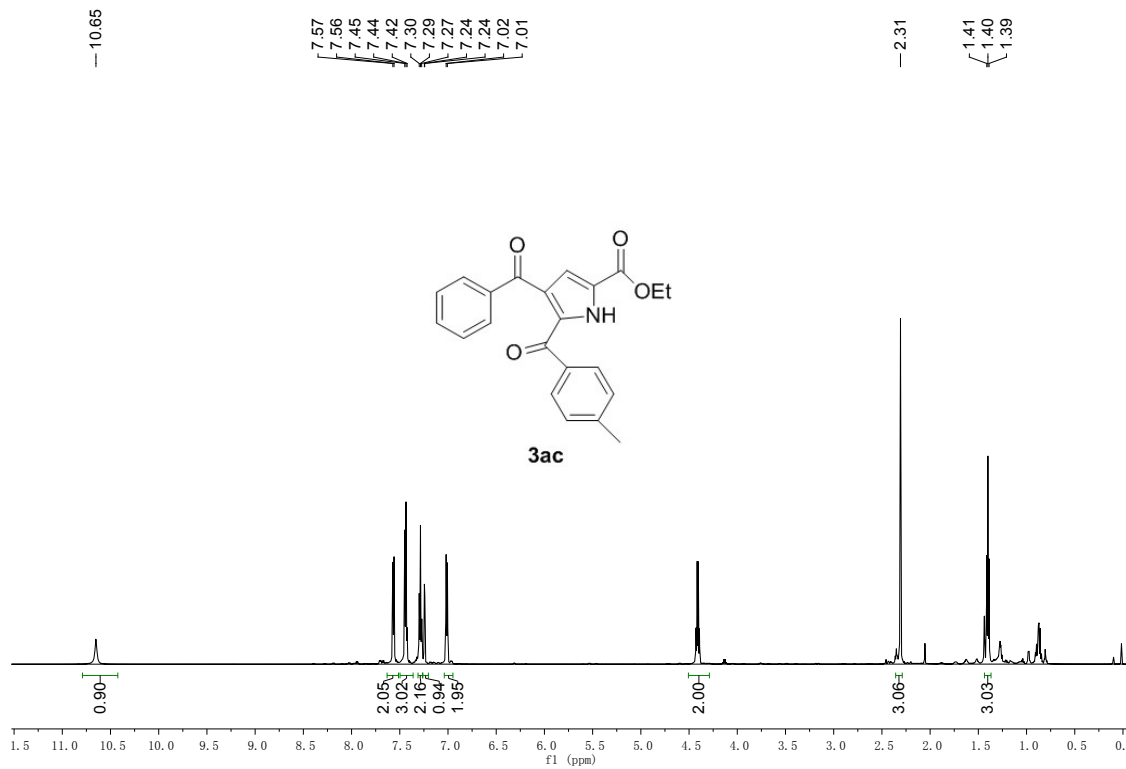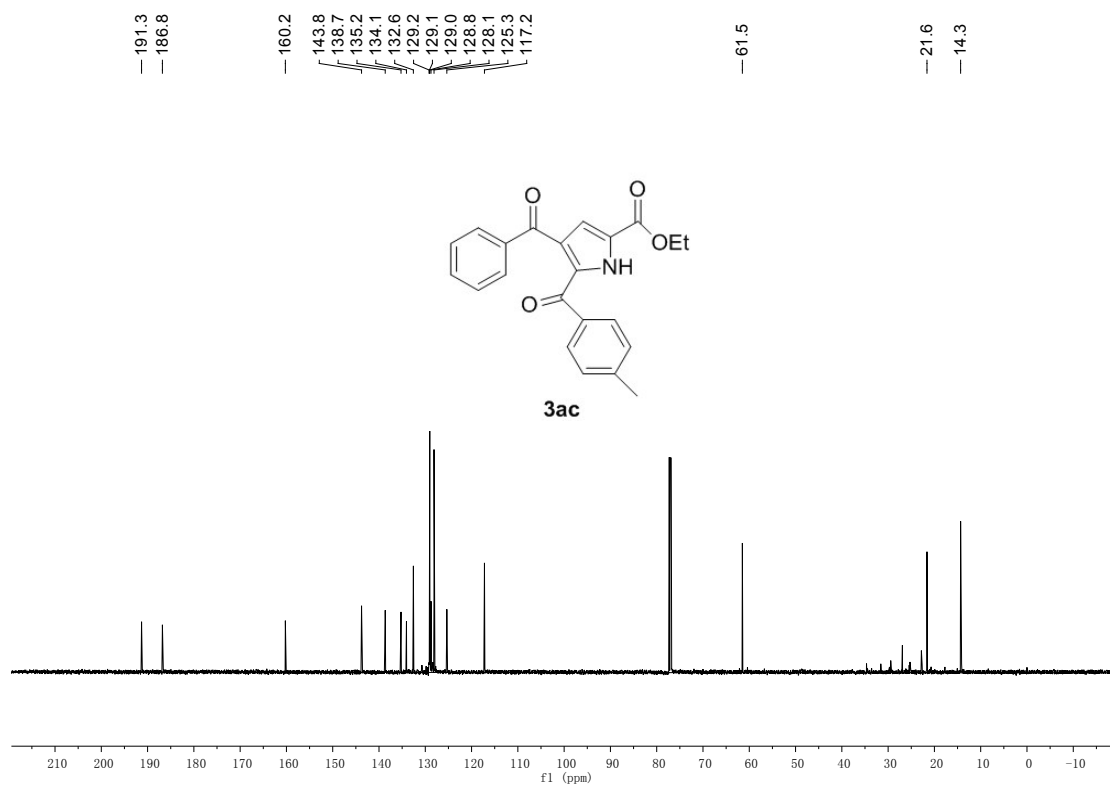

14. 3ad



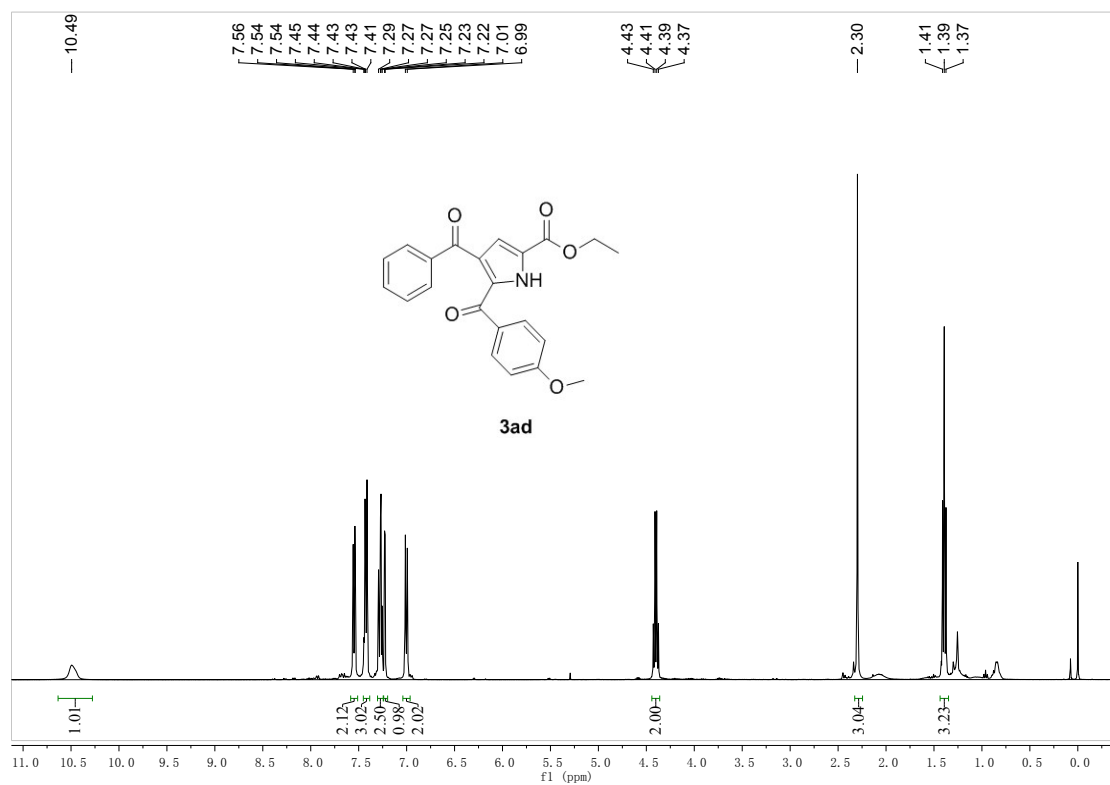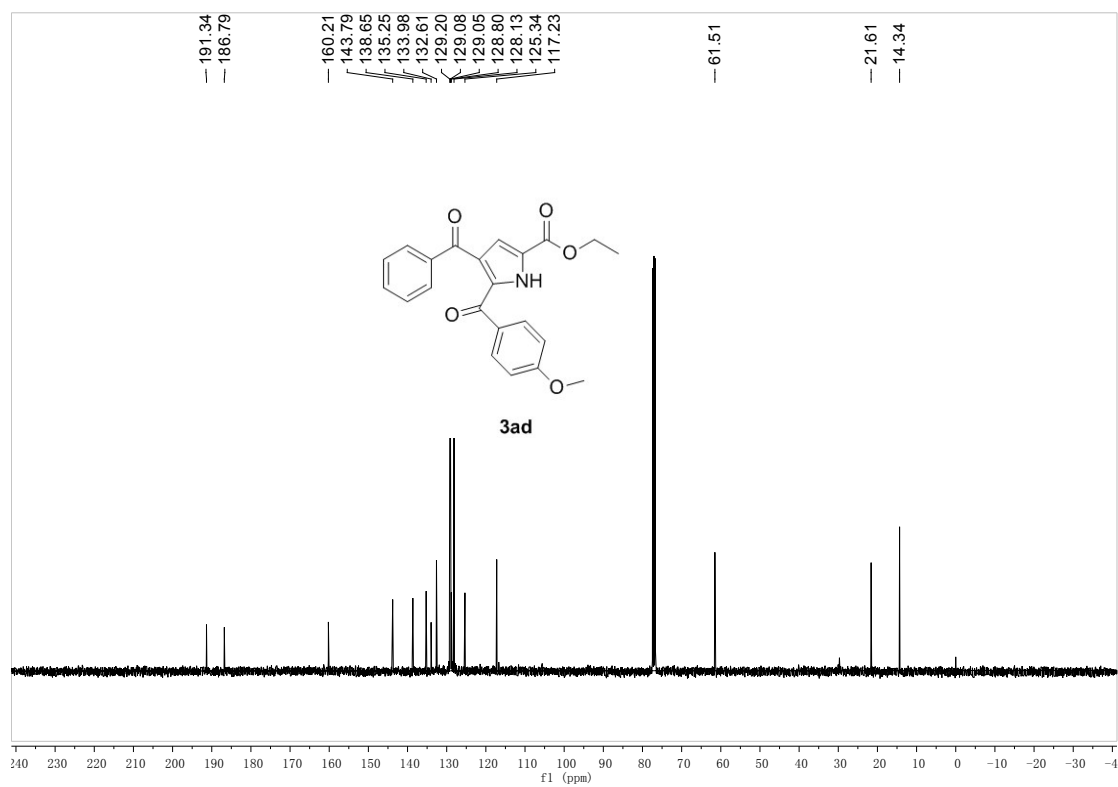

15. 3ae

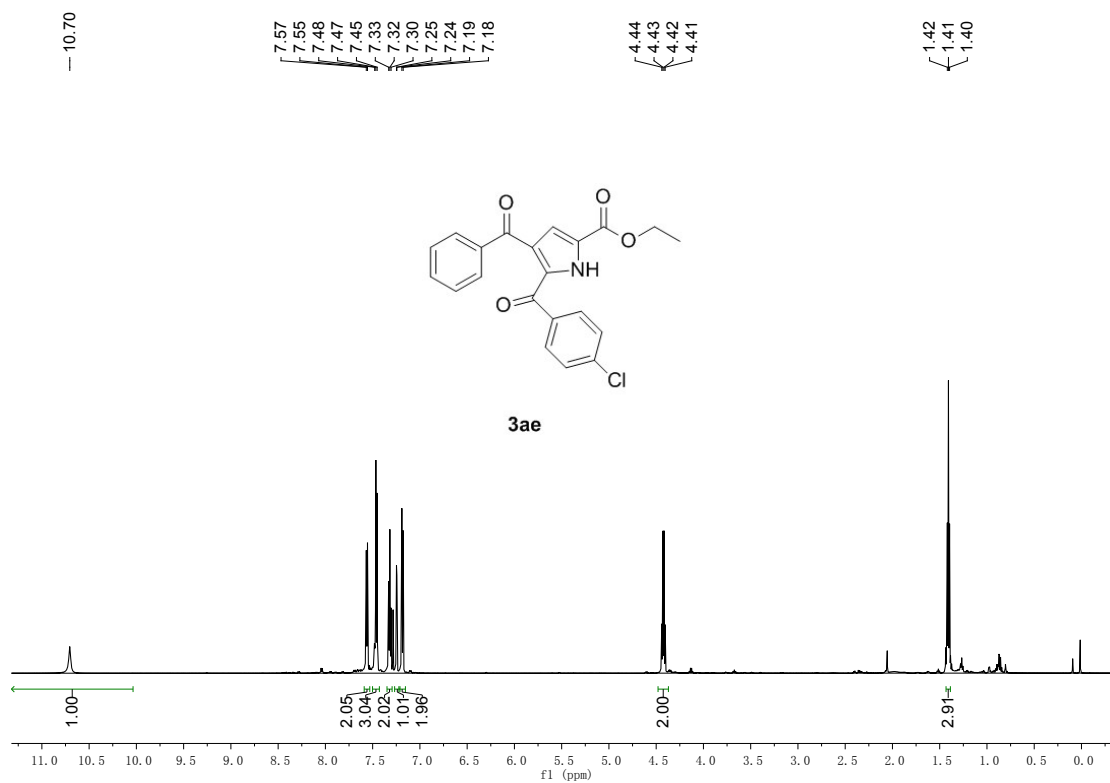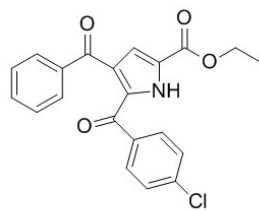

3ae

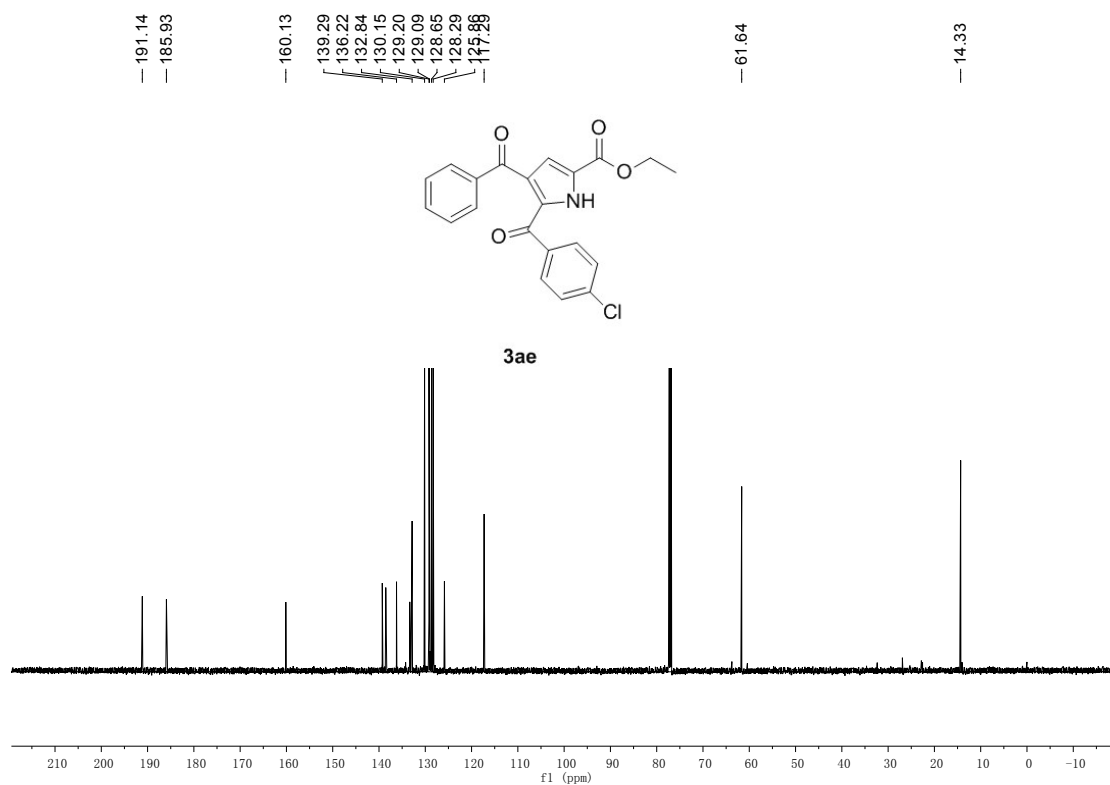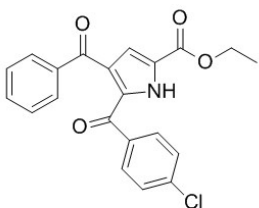

3ae

16. 3af

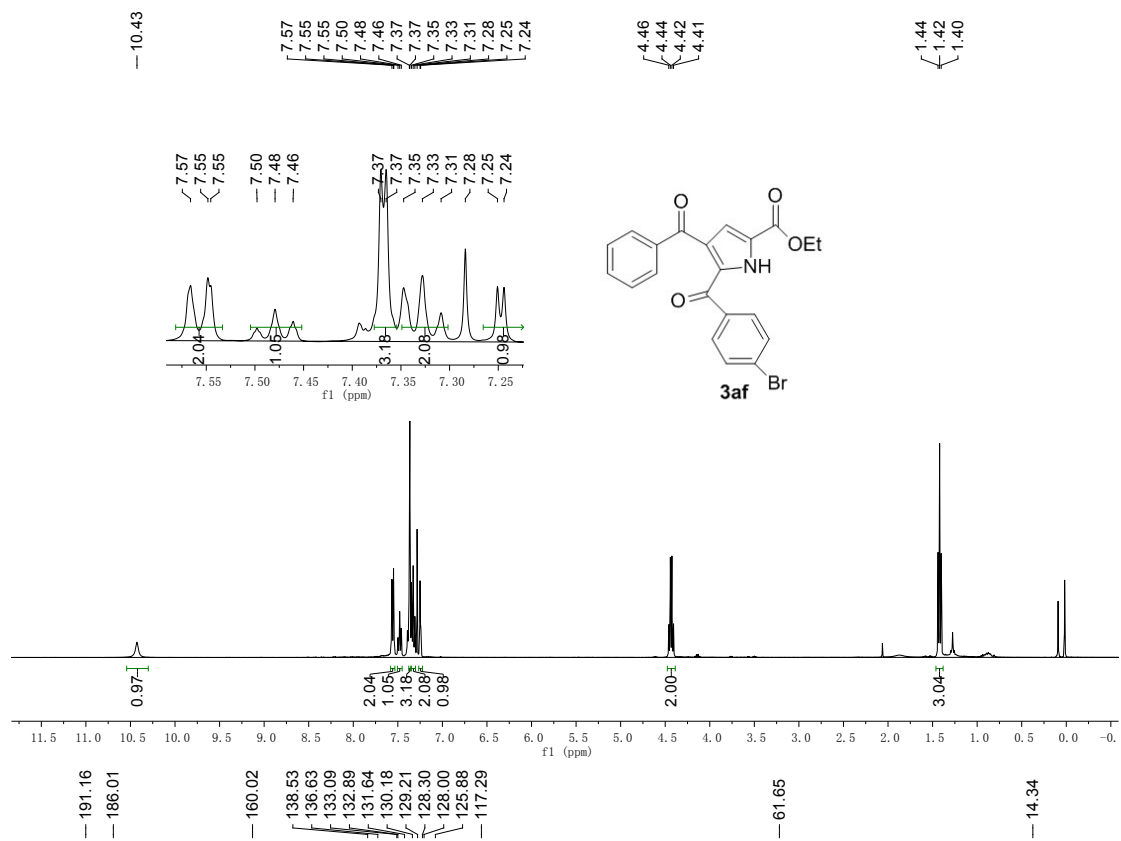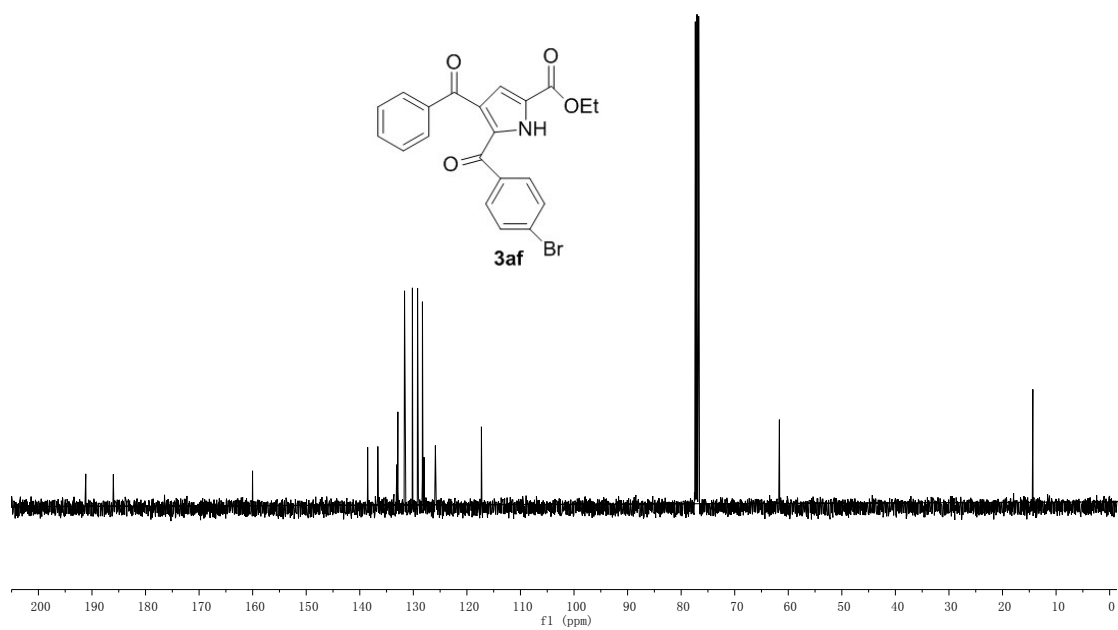

17. 3bb

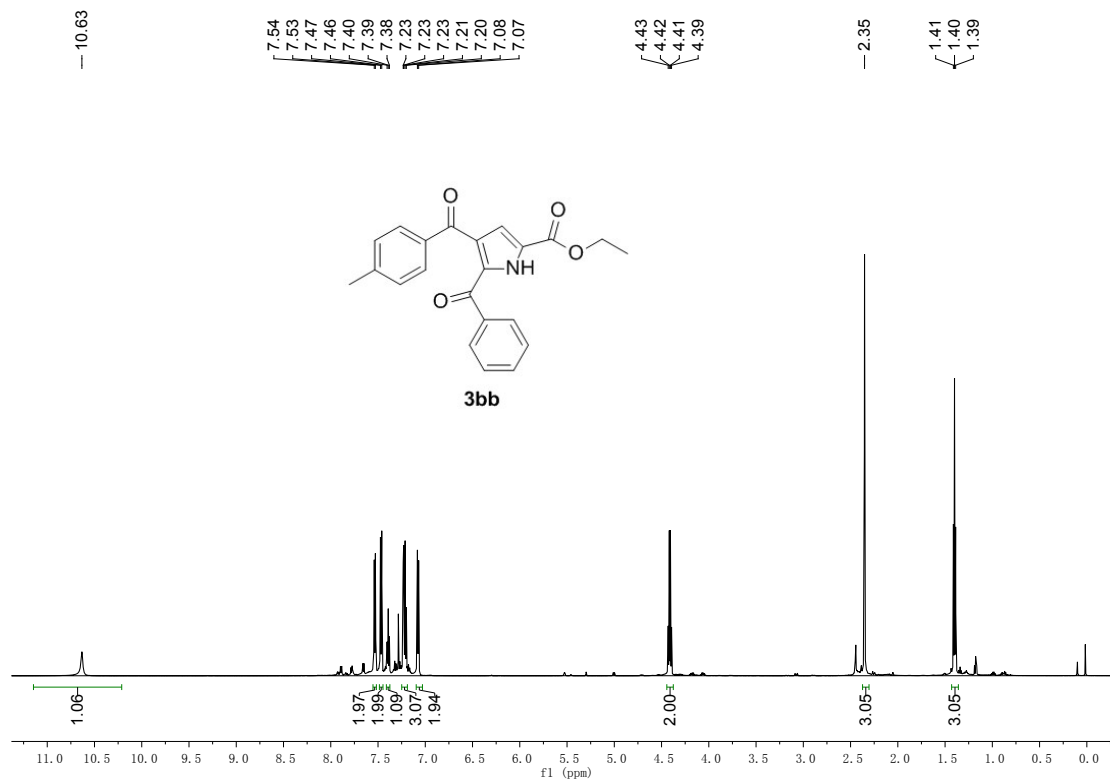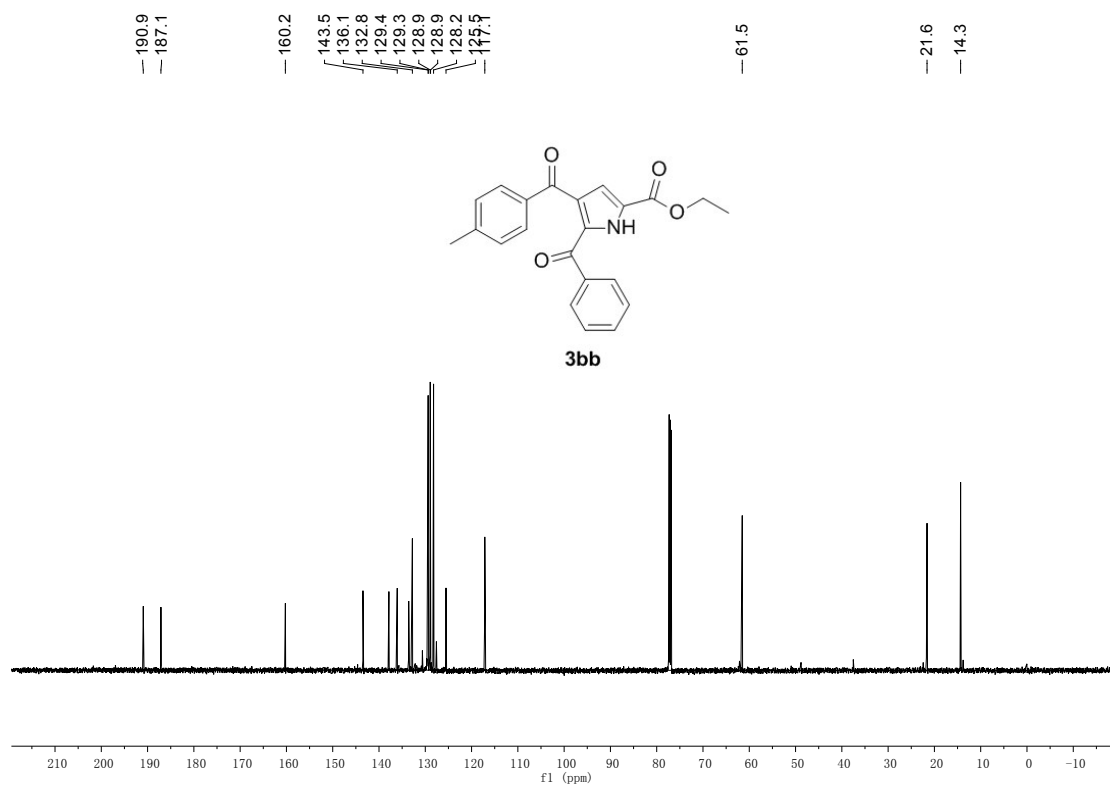

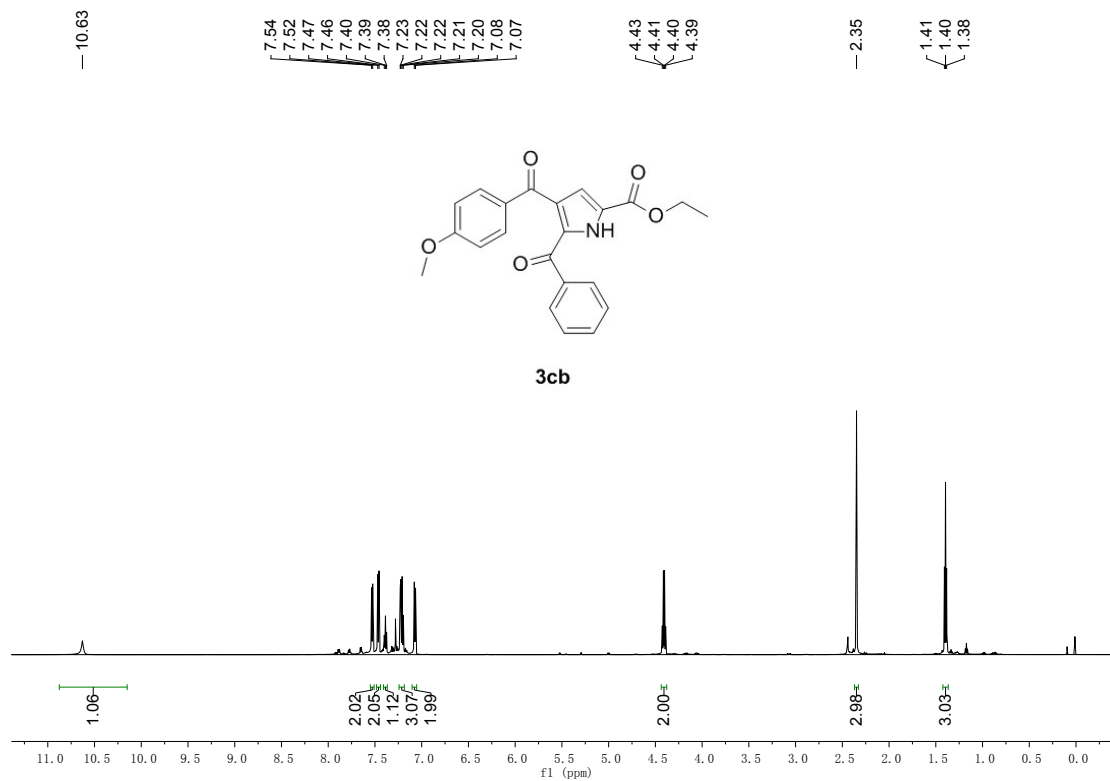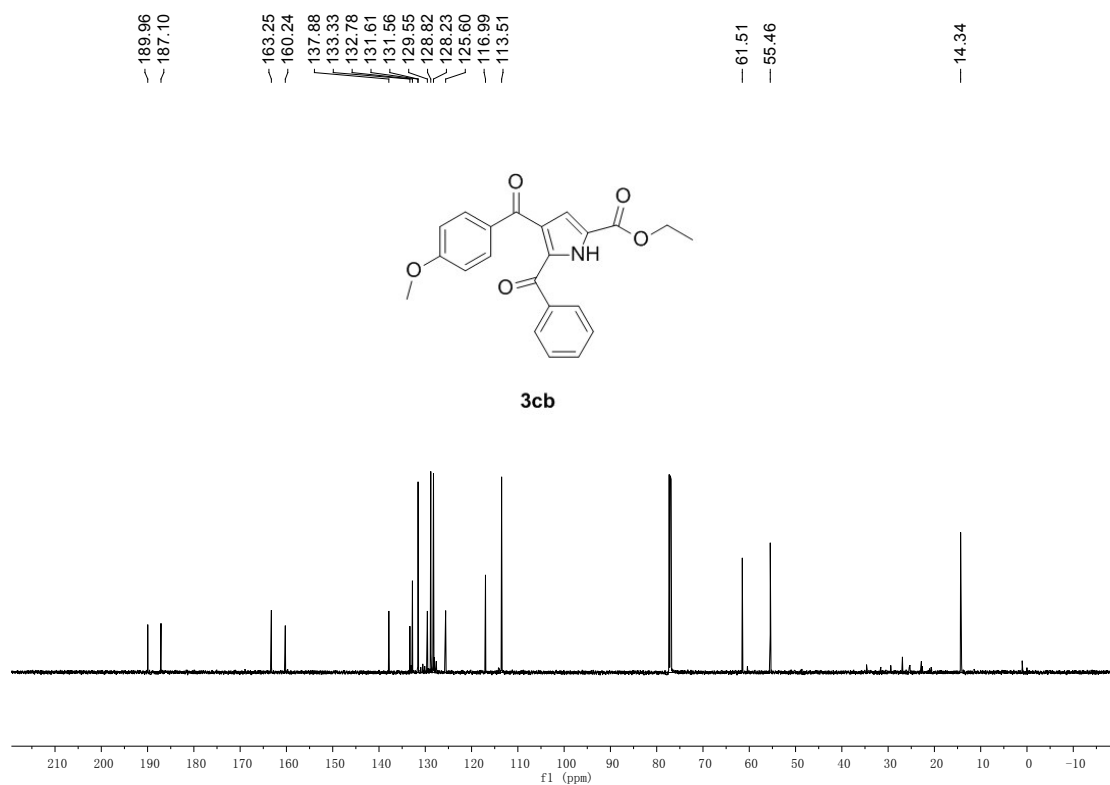

19. 3db

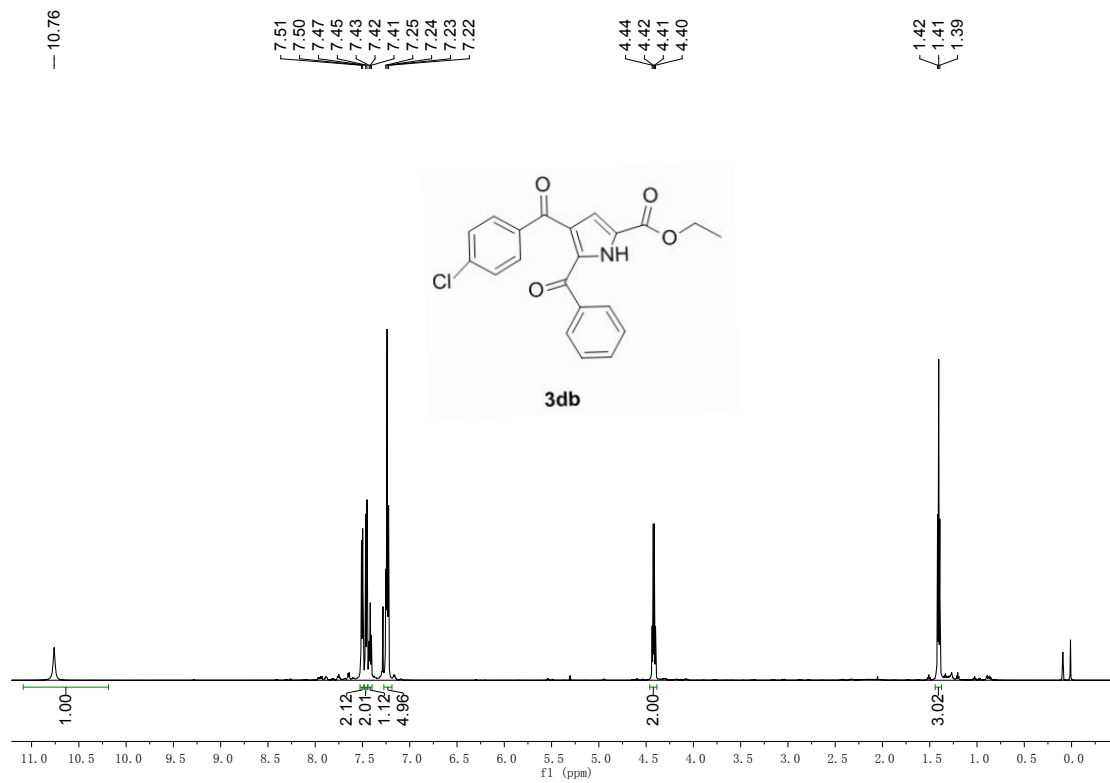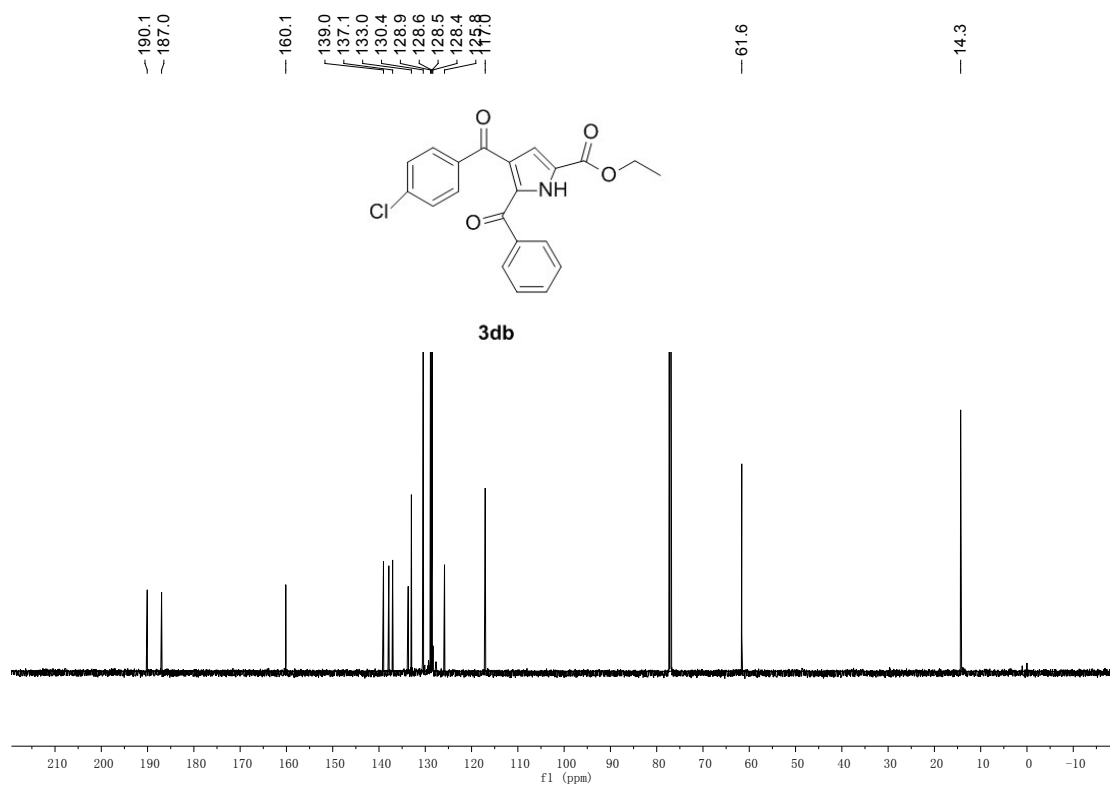

20. 3eb

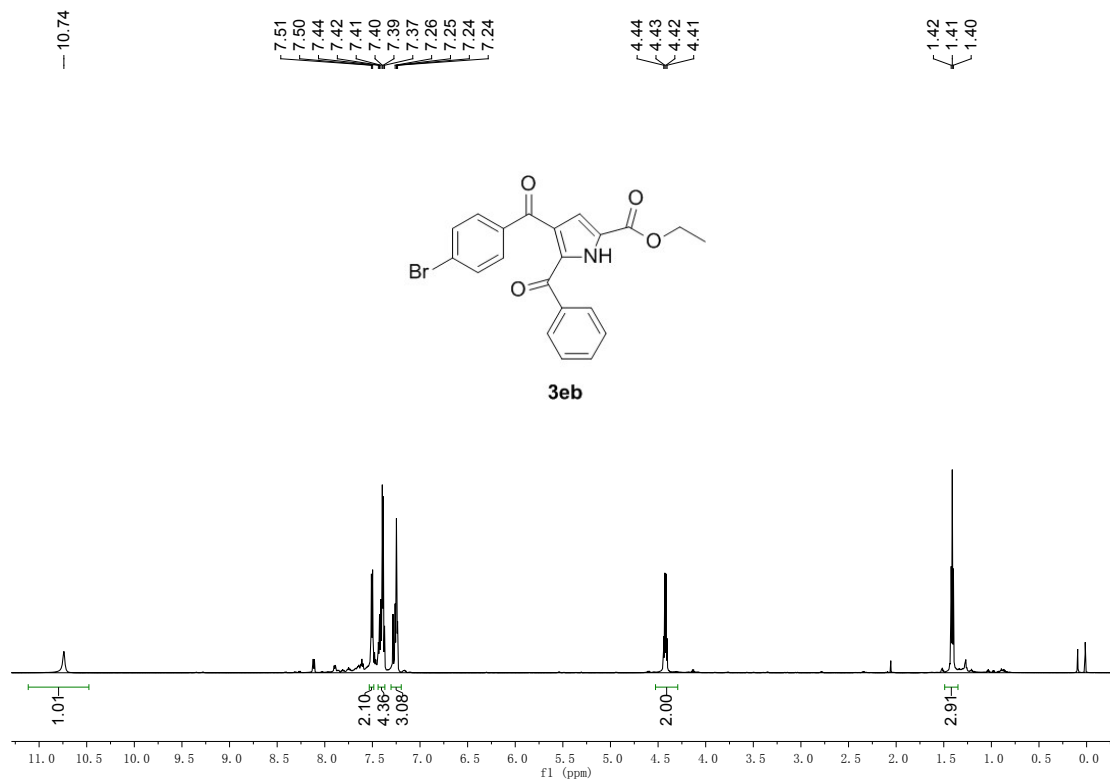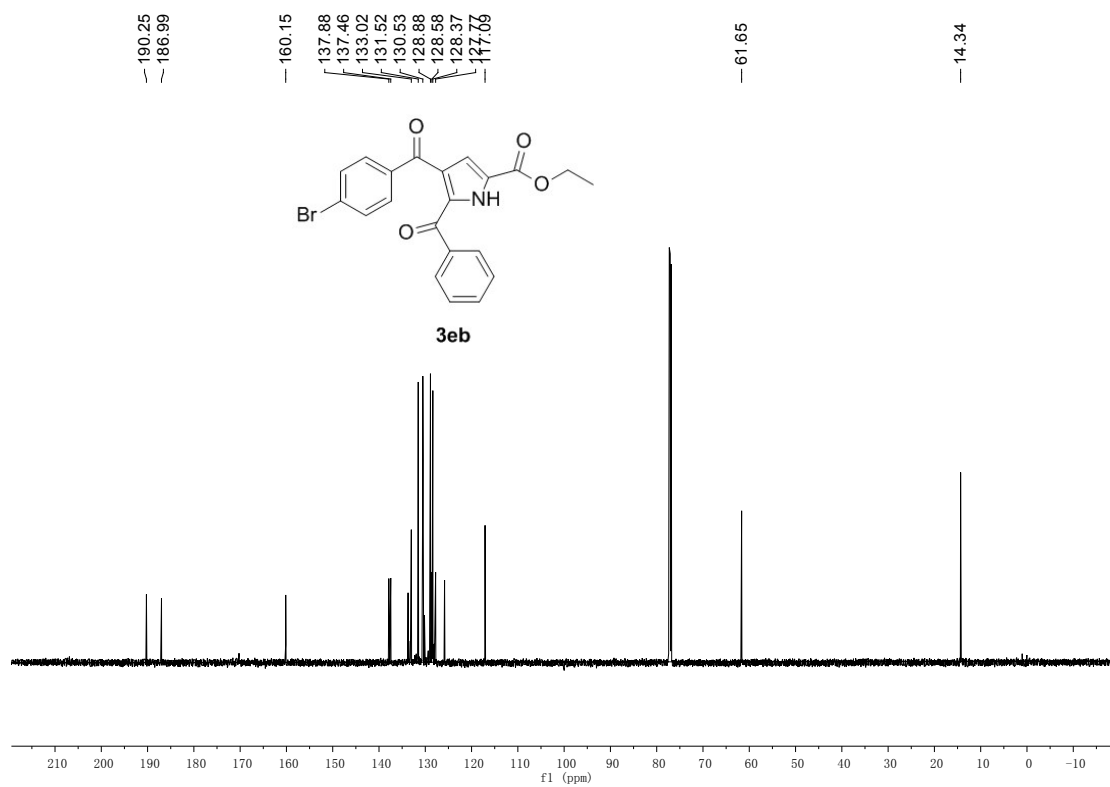

21. 3fb

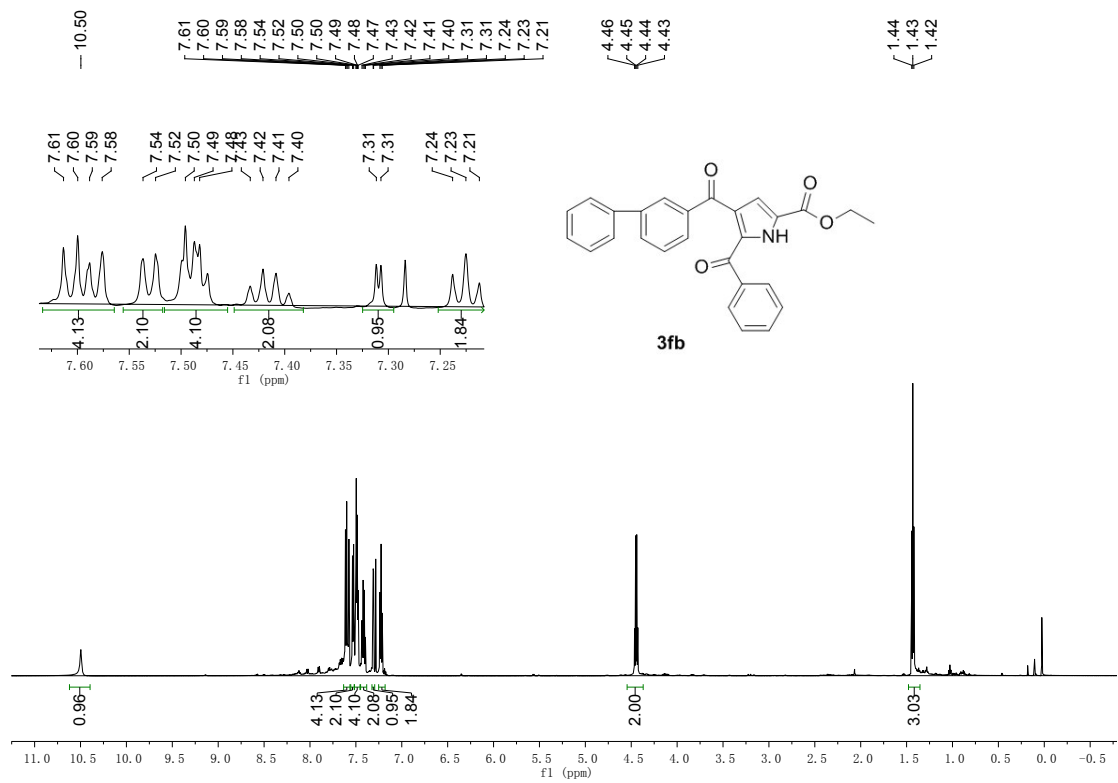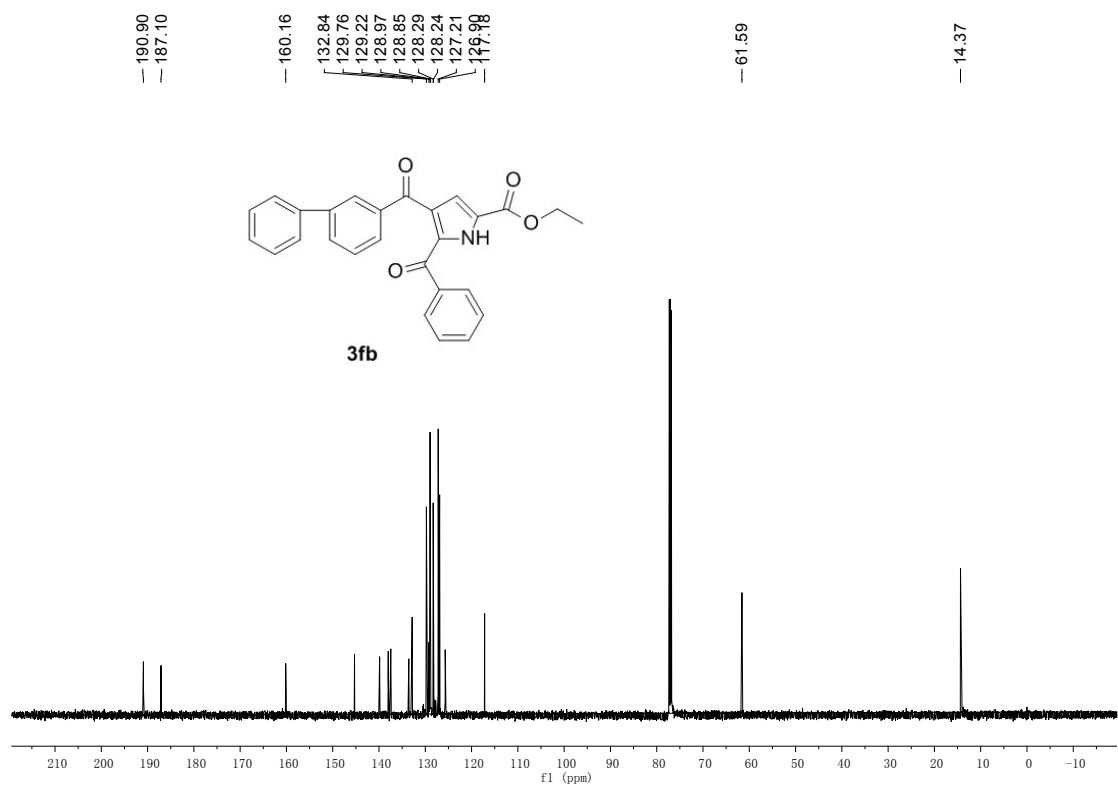

22. 3hb



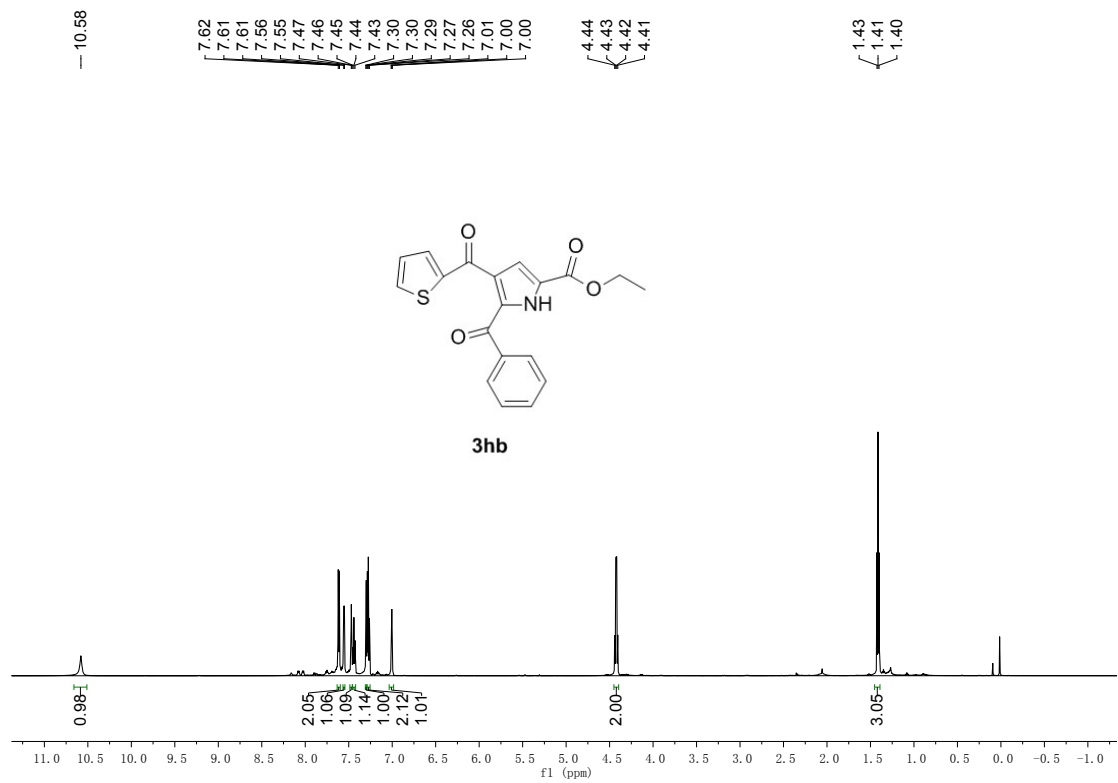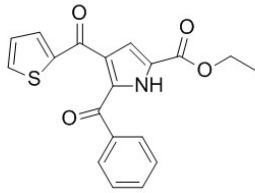

3hb

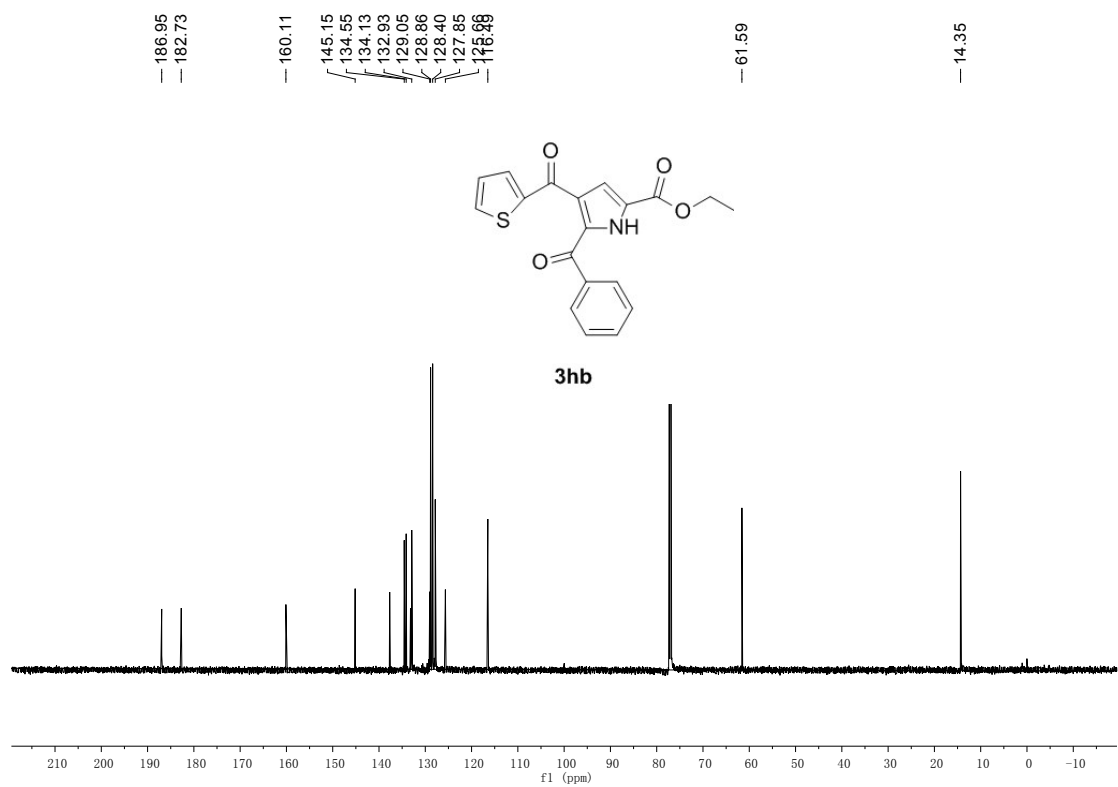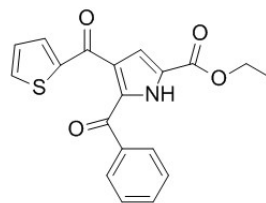

3hb

23. 3ib

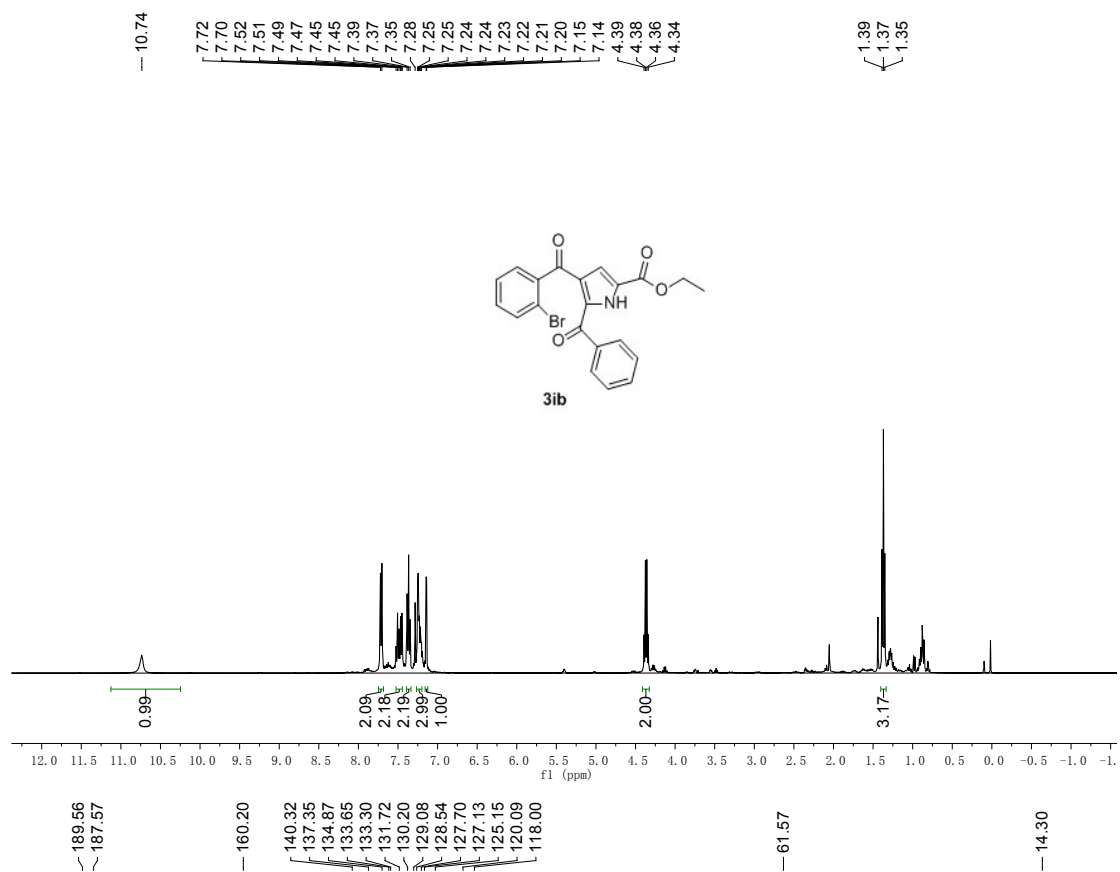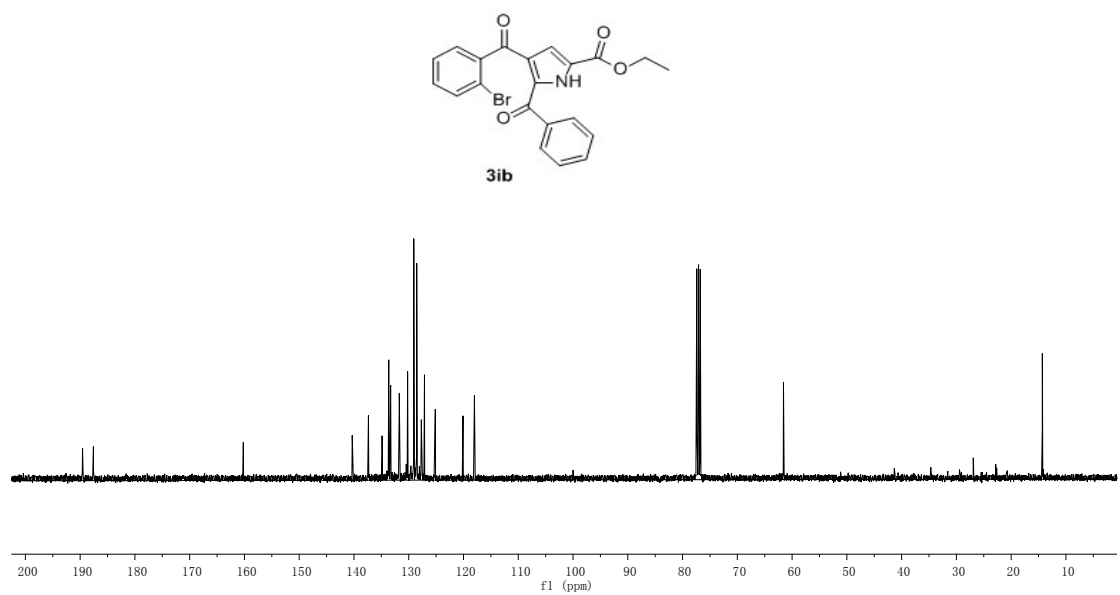

### III、Crystallographic information for 3ba

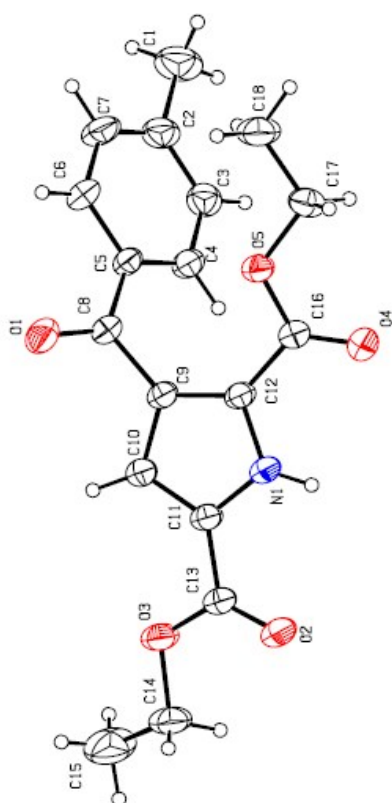

Figure 1. Crystal structure of **3ba**

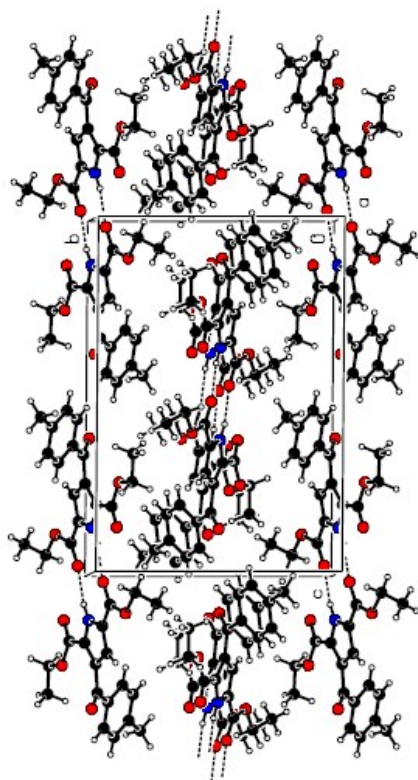

Figure 2. Projection of one unit cell
